# DNA sequence differences and temperature are determinants of meiotic recombination outcome

Simon D. Brown<sup>1,3</sup>, Mimi N. Asogwa<sup>1</sup>, Marie Jézéquel<sup>1</sup>, Charlotte Audouinaud<sup>1,4</sup>, Samantha J. Mpaulo<sup>1</sup>, Matthew C. Whitby<sup>2</sup>, and Alexander Lorenz<sup>1,\*</sup>

<sup>1</sup>The Institute of Medical Sciences (IMS), University of Aberdeen, Foresterhill, Aberdeen AB25 2ZD, UK

<sup>2</sup>Department of Biochemistry, University of Oxford, South Parks Road, Oxford OX1 3QU, UK

<sup>3</sup>Present address: MRC Institute of Genetics & Molecular Medicine, University of Edinburgh, Edinburgh EH4 2XU, UK

<sup>4</sup>Present address: Institut Curie, PSL Research University, UMR3348-CNRS, 91405 Orsay, France

\*Correspondence should be addressed to

Alexander Lorenz

Institute of Medical Sciences (IMS)

University of Aberdeen

Foresterhill

Aberdeen AB25 2ZD

United Kingdom

Phone: +44 1224 437323

E-mail: [a.lorenz@abdn.ac.uk](mailto:a.lorenz@abdn.ac.uk)

28 **Abstract**

29 Meiotic recombination is essential for producing healthy gametes, and also generates genetic  
30 diversity. DNA double-strand break (DSB) formation is the initiating step of meiotic recombination,  
31 producing, among other outcomes, crossovers between homologous chromosomes, which provide  
32 physical links to guide accurate chromosome segregation. The parameters influencing DSB position  
33 and repair are thus crucial determinants of reproductive success and genetic diversity. Using  
34 *Schizosaccharomyces pombe*, we show that the distance between sequence polymorphisms across  
35 homologous chromosomes has a strong impact on recombination, not only locally as intragenic  
36 events, but also on crossover frequency. This effect is controlled by MutS-MutL factors and DNA  
37 helicases. Additionally, we establish temperature as a major factor modulating meiotic recombination  
38 frequency, and identify DSB processing as a temperature-sensitive step in the meiotic recombination  
39 pathway. This exposes a complex interplay of genetic and environmental parameters shaping the  
40 outcome of meiotic recombination.

41

## 42 Introduction

43 Correct chromosome segregation during meiosis depends on pairing and physical connection of  
44 homologous chromosomes (homologs). Physical connections are established by the repair of  
45 programmed DNA double-strand breaks (DSBs) using the homolog rather than the sister chromatid  
46 as a template (i.e. interhomolog recombination) and by ensuring that interhomolog recombination  
47 intermediates are processed into crossovers (COs). The formation of DSBs by the transesterase  
48 Spo11 is thus a key step in initiating recombination during meiosis (Lam and Keeney 2015). Regions  
49 of high-frequency Spo11 recruitment, and thus DSB formation, are called hotspots (Wahls and  
50 Davidson 2012). One of the best characterized category of hotspots are cAMP-responsive elements,  
51 such as the *ade6-M26* hotspot and its derivatives in *Schizosaccharomyces pombe*, created by point  
52 mutations in the *ade6* gene (Wahls and Davidson 2012). *M26*-like hotspots are defined by the DNA  
53 sequence heptamer 5'-ATGACGT-3', which represents the core of a binding site for the Atf1-Pcr1  
54 transcription factor (Kon et al. 1997). Although binding of Atf1-Pcr1 and associated transcription  
55 already creates open chromatin at *M26*-like hotspots (Kon et al. 1997; Yamada et al. 2017), a very  
56 high frequency of meiotic recombination requires a conducive chromatin environment in a wider  
57 genomic context (Steiner and Smith 2005; Yamada, Ohta, and Yamada 2013). This network of  
58 parameters determines the overall level of DSB formation at a given genomic locus.

59 Following break formation, DSB ends are resected to initiate homologous recombination,  
60 which during meiosis follows either a Holliday junction/D-loop resolution or a synthesis-dependent  
61 strand annealing pathway (Lam and Keeney 2015; Hunter 2015). As a repair template, the sister  
62 chromatid or the homolog will be used (Humphryes and Hochwagen 2014). Based on this, it has  
63 been suggested that the governance of meiotic recombination could be viewed as a two-tiered  
64 decision system (Lorenz 2017). The first decision being template choice (interhomolog vs. intersister  
65 recombination), and the second being how the recombination intermediate is resolved - i.e. the  
66 CO/non-crossover (NCO) decision. The template choice decision is mainly driven by meiosis-specific  
67 factors of the chromosome axis and by the meiotic recombinase Dmc1 supported by its mediators  
68 (Humphryes and Hochwagen 2014). In budding yeast there is a basic understanding of how the  
69 interhomolog bias is established, although some mechanistic details still remain to be elucidated  
70 (Hong et al. 2013). Since homologs are not necessarily identical on a DNA sequence level, a DSB  
71 end invading the homolog for repair can generate a mismatch-containing heteroduplex DNA.  
72 Mismatches can be corrected by the mismatch repair system, consisting of the highly conserved  
73 MutS and MutL proteins (Surtees, Argueso, and Alani 2004). Additionally, the MutS-MutL complex  
74 can also block strand invasion to avoid recombination between non-homologous sequences  
75 (Surtees, Argueso, and Alani 2004). The CO/NCO-decision happens as the next step; here the  
76 decision is taken whether an already established interhomolog recombination intermediate is  
77 processed into a CO or a NCO. Determinants of the CO/NCO-decision are less well studied, but the  
78 DNA helicase/translocase FANCM (Fml1 in *Sz. pombe*) has been shown to limit CO formation in  
79 fission yeast and *Arabidopsis* (Lorenz et al. 2012; Crismani et al. 2012). RecQ-type DNA helicases  
80 perform a wide range of regulatory roles in homologous recombination, and one of them probably is  
81 the promotion of NCO formation during meiosis in various organisms (De Muyt et al. 2012;  
82 Lukaszewicz, Howard-Till, and Loidl 2013; Hatkevich et al. 2017).

83 In addition to these intrinsic genetic determinants, environmental factors play a role in  
84 dictating the outcome and dynamics of meiotic recombination. Environmental temperature has been  
85 identified as a modulating factor of meiotic recombination frequency in organisms incapable of  
86 regulating their body temperature (Bomblies, Higgins, and Yant 2015). The laboratory model yeasts  
87 *Sz. pombe* and *Saccharomyces cerevisiae* are globally distributed species with a poorly understood  
88 ecology (Liti 2015; Jeffares 2018), but it is likely that they are exposed to changing temperatures in  
89 their respective niches. Although a few observations about environmental temperature altering  
90 meiotic recombination have been made in the past in a variety of organisms, including yeasts (Plough

1917; Rose and Baillie 1979; Börner, Kleckner, and Hunter 2004; Pryce et al. 2005; Higgins et al. 2012), only recently more systematic approaches have explored the effect of the full temperature range at which meiosis is possible on meiotic recombination in a particular organism (Zhang et al. 2017; Lloyd et al. 2018; Modliszewski et al. 2018).

Here, we employ a series of genetic recombination assays featuring intragenic markers at differently sized intragenic intervals and flanking intergenic markers to identify and characterize intrinsic determinants of template choice and CO/NCO-decision in fission yeast. We show that the relative positions of DNA sequence polymorphisms between homologs have a strong impact on recombination outcome, not only locally in the form of intragenic recombination, but also on the CO frequency between an up- and a downstream marker. The anti-recombinogenic activity of MutS-MutL factors, and of the DNA helicases Fml1 and Rqh1 modulate recombination outcome differentially when comparing various intragenic intervals. Furthermore, we provide evidence how a simple environmental factor, such as temperature, influences recombination outcome locally, and identify DSB processing as the likely temperature-sensitive step of meiotic recombination.

## Results

### Rationale of the meiotic recombination assay

Our genetic recombination assay features intragenic markers (point mutations in the *ade6* gene) and flanking intergenic markers (*his3<sup>+</sup>-aim* and *ura4<sup>+</sup>-aim2*) (Figure 1A-B). This assay allows us to monitor various recombination outcomes: (I) intragenic recombination events producing *ade6<sup>+</sup>* recombinants, (II) crossovers (COs) between the flanking intergenic markers (*his3<sup>+</sup>-aim* and *ura4<sup>+</sup>-aim2*), and (III) the ratio of COs vs. non-crossovers (NCOs) among intragenic *ade6<sup>+</sup>* recombination events (Figure 1A). Changes in intragenic recombination and overall CO frequencies observed in this assay can be explained by an altered frequency of DSB formation at a given *ade6* mutant allele, or a change in repair template usage. The percentage of COs and NCOs among intragenic *ade6<sup>+</sup>* recombination events is the genetic readout for the CO/NCO-decision, representing recombination intermediate processing after successful strand exchange between homologs. These events can be the result of gene conversions associated with COs or NCOs (non-reciprocal exchange of hereditary information), or of intragenic COs as a result of recombination intermediate resolution between the two point mutations within *ade6* (reciprocal event) (Figure 1A, Figure 1-figure supplement 1; see below for details).

### The physical distance between point mutations of heteroalleles defines the frequency of intragenic recombination events and their associated CO/NCO ratio

Apart from absolute DSB levels, intragenic recombination frequency is also influenced by the distance between point mutations in a given chromosomal region (Gutz 1971; Zahn-Zabal and Kohli 1996; Fox et al. 1997; Steiner and Smith 2005). Intragenic recombination in our assays (Figure 1A) has so far been monitored using point mutations within the *ade6* coding sequence, which are at least 1kb apart (Osman et al. 2003; Lorenz, West, and Whitby 2010; Lorenz et al. 2012). We wondered whether the level of COs among intragenic recombination events also changes, when the distance between point mutations was decreased. Therefore, we selected a series of point mutations, which cover almost the complete length of the *ade6* coding sequence (Figure 1B, Figure 1-table supplement 2). These point mutants include the strong meiotic recombination hotspots *ade6-M26*, -3074, -3083, at the 5' end of the gene and -3049 at the 3' prime end of the gene, as well as the weak hotspot *ade6-M375*, and the non-hotspot alleles *ade6-M216*, -704, -52, -149, -51, and -469 (Figure 1B, Figure 1-table supplement 2). All strong hotspots mimic a cAMP-response element/Atf1-Pcr1 binding site (Kon et al. 1997; Steiner and Smith 2005). It can be safely assumed that a given hotspot will receive the same amount of breakage independent of the *ade6* allele present on the homolog.

140 This means that the differences seen in the combinations of one specific hotspot with various *ade6*  
141 alleles will depend on processes downstream of DSB formation. Indeed, the frequency of intragenic  
142 recombination positively correlates with the distance between the *ade6* alleles, when the same  
143 hotspot is used (Figure 1C, black and grey lines). The weak hotspot allele *ade6-M375*, which is at a  
144 similar position as the strong hotspot alleles *ade6-3074* & *ade6-3083*, induces recombination only  
145 moderately. However, intragenic recombination frequency at *ade6-M375* shows a similar correlation  
146 with respect to distance between the DNA polymorphisms (Figure 1C, green line). Intragenic  
147 intervals of similar size containing the meiotic recombination hotspot alleles, *ade6-3083*, *ade6-3074*,  
148 or *ade6-3049*, and a non-hotspot allele produce equivalent intragenic recombination levels (Figure  
149 1C). Therefore, these hotspot alleles behave similarly in determining intragenic recombination  
150 frequency. Intriguingly, these observations are also largely true for CO frequency among intragenic  
151 recombination events. The shorter an intragenic distance between polymorphisms is, the more likely  
152 an intragenic recombination event is resolved as a NCO (Figure 1D). For crosses involving the  
153 hotspot alleles *ade6-3083* or *ade6-3074* the effect apparently tails off at intragenic distances >600bp  
154 (Figure 1D). Combining hotspot alleles on both homologs within a cross results in increased overall  
155 intragenic recombination rate compared with hotspot × non-hotspot crosses (Figure 1E), similar to  
156 what was previously reported (Hyppa and Smith 2010). However, there is no notable increase in  
157 COs among intragenic recombination events when compared to hotspot × non-hotspot crosses with  
158 similar intragenic distance between point mutations (Figure 1F). This indicates that the frequency of  
159 CO among intragenic recombination events is a function of the distance between the *ade6*  
160 heteroalleles on the homologs. The distribution of different NCO/CO classes amongst intragenic  
161 recombination events follows a pattern consistent with intragenic NCOs events more likely being  
162 associated with the hotter allele. This means that the allele more likely to receive a DSB is the  
163 recipient of genetic information in the overwhelming majority of cases, which might represent a *bona*  
164 *fide* gene conversion (Figure 1G). If comparable hotspots are combined in a cross the two intragenic  
165 NCO classes occur with roughly equal frequency (Figure 1G, compare cross *ade6-3083*×*ade6-3049*  
166 to crosses *ade6-3083*×*ade6-469* & *ade6-M375*×*ade6-3049*).

167 The observed distribution patterns also suggest that, at these long intragenic intervals, a  
168 subset of CO events could stem from the processing of one joint molecule, presumably a single  
169 Holliday junction (Cromie et al. 2006) or its precursors, positioned between the two *ade6* point  
170 mutations, in contrast to a gene conversion event being resolved as a CO. This hypothesis makes  
171 the following prediction: If CO events among Ade<sup>+</sup> recombinants (mostly Ura<sup>-</sup> His<sup>-</sup> genotypes) are  
172 created by processing of a joint molecule situated between the two *ade6* point mutations, then  
173 reciprocal Ade<sup>-</sup> Ura<sup>+</sup> His<sup>+</sup> recombinants carrying the mutations of both *ade6* heteroalleles must  
174 exist. To test this, we sequenced the *ade6* locus from 32 Ade<sup>-</sup> Ura<sup>+</sup> His<sup>+</sup> colonies from an *ade6-*  
175 *3083*×*ade6-469* cross. Based on the frequency of 0.677% Ade<sup>+</sup> Ura<sup>-</sup> His<sup>-</sup> events among the total  
176 viable progeny in such a cross representing 8.375% of recombinants among all Ura<sup>-</sup> His<sup>-</sup> colonies  
177 (240 Ura<sup>-</sup> His<sup>-</sup> colonies among 2,969 total viable progeny, 8.083%), we would expect that 2-3 of the  
178 32 Ade<sup>-</sup> Ura<sup>+</sup> His<sup>+</sup> carry both the *3083* and the *469* mutation within the *ade6* locus, if all events were  
179 generated by CO processing of a recombination event between the two heteroalleles. Indeed, we  
180 observed 2 instances in which the *ade6* locus of Ade<sup>-</sup> Ura<sup>+</sup> His<sup>+</sup> progeny harbored both mutations  
181 (Figure 1-figure supplement 1), supporting the existence of intragenic COs (Figure 1A).

### 182 183 **MutS $\alpha$ and MutL $\alpha$ are strong negative modulators of recombination frequency specifically at** 184 **short intragenic intervals**

185 Potential candidates for genetic pathways modulating recombination frequency at intragenic  
186 intervals of different lengths are MutS-MutL complexes which bind to heteroduplex DNA and repair  
187 mismatches (Surtees, Argueso, and Alani 2004). *Sz. pombe* has a streamlined nuclear mismatch  
188 repair system consisting of MutS $\alpha$  (Msh2-Msh6), MutS $\beta$  (Msh2-Msh3), and a single MutL (MutL $\alpha$ ,  
189 Mhl1-Pms1); there is also a mitochondrial MutS protein called Msh1 (Marti, Kunz, and Fleck 2002).



190 Importantly, the meiotic pro-crossover factors MutS $\gamma$  (Msh4-Msh5), the meiosis-specific MutL $\gamma$   
191 component Mlh3, and Mlh2 – a MutL $\beta$ -homolog and a modulator of meiotic gene conversion tract  
192 length – are all missing in fission yeast (Manhart and Alani 2016; Duroc et al. 2017). This suggests  
193 that *Sz. pombe* is a suitable model to study the role of MutS $\alpha/\beta$ -MutL $\alpha$  during meiosis without  
194 potential crosstalk from MutS $\gamma$ -MutL $\gamma$  pro-crossover factors (Rogacheva et al. 2014).

195 At small intragenic intervals the absence of MutS $\alpha$ -MutL $\alpha$  causes a substantial increase in  
196 intragenic recombination frequency (Figure 2A, Figure 2-figure supplement 1). This relationship  
197 shows an inverse correlation, i.e. the shorter the intragenic interval the higher the increase. This  
198 ranges from a ~70-fold increase at the *ade6-149*×*ade6-3049* (33bp) interval, via a ~35-fold one at  
199 *ade6-3049*×*ade6-51* (53bp), to a ~10-fold augmentation at the *ade6-M216*×*ade6-3083* (85bp)  
200 interval (Figure 2A, Figure 2-figure supplement 1). The MutS $\alpha$  mutants (*msh2-30*, *msh6*Δ) and the  
201 MutL $\alpha$  mutants (*mlh1*Δ, *pms1-16*) displayed similar frequencies of intragenic recombination to each  
202 other, and the *msh2-30 mlh1*Δ double mutant is not discernible from either single mutant (Figure  
203 2A), indicating that MutS $\alpha$  and MutL $\alpha$  work in the same pathway. Deleting MutS $\beta$  (*msh3*) is of no  
204 consequence at the *ade6-M216*×*ade6-3083* interval (Figure 2A; *p*=0.613 against wild type, two-tailed  
205 Mann-Whitney U), likely because all the *ade6* mutations tested are substitution mutations, and  
206 MutS $\beta$  only recognizes insertion/deletion loop mismatches larger than 2 nucleotides (Surtees,  
207 Argueso, and Alani 2004). At larger intragenic intervals, there seems to be little or no role for MutS $\alpha$ -  
208 MutL $\alpha$  in limiting recombination events. In fact, a moderate, but mostly non-significant, tendency of  
209 lower intragenic recombination frequency can be observed (Figure 2B, Figure 2-figure supplement  
210 1). Altogether, these data show that MutS $\alpha$ -MutL $\alpha$  has a strong anti-recombinogenic role at small  
211 intragenic intervals, but seemingly no role in determining recombination outcome at large intragenic  
212 intervals.

213 Mutating *mutS* $\alpha$ -*mutL* $\alpha$  genes increases CO frequency among intragenic recombination  
214 events (Figure 2C-D, Figure 2-figure supplement 2) and/or changes the distribution of recombinant  
215 classes (Figure 2-figure supplement 3). Both long and short intragenic intervals involving the *ade6*-  
216 *3083* allele showed increases in associated CO frequency in comparison to wild type, albeit this  
217 trend was not statistically significant in all cases (Figure 2C-D, Figure 2-figure supplement 2). This  
218 trend makes the share of COs among intragenic recombination events independent of the length of  
219 the interval (compare Figure 1D with Figure 2C-D, Figure 2-figure supplement 2). Interestingly, there  
220 is also a substantial shift in CO classes among intragenic recombination events from mostly *ura*<sup>-</sup> *his*<sup>-</sup>  
221 to mainly *ura*<sup>+</sup> *his*<sup>+</sup> in *mutS* $\alpha$ -*mutL* $\alpha$  mutants at the short *ade6-M216*×*ade6-3083* interval (Figure 2-  
222 figure supplement 3). This is not a consequence of selective survival or the formation of diploid or  
223 disomic spores, because *mutS* $\alpha$ -*mutL* $\alpha$  mutants have a spore viability similar to wild type, and the  
224 extent of the phenotype is the same in several different mutants (Supplementary File 1-Table S2).  
225 The possible significance of this finding is considered in the Discussion. As with intragenic  
226 recombination frequency, the *mutS* $\beta$  deletion *msh3*Δ behaves just like wild type for CO outcome  
227 (Figure 2C-D; *p*=0.439 against wild type, two-tailed Mann-Whitney U).

### 228 229 **Fml1 is a negative modulator of intragenic CO frequency independent of the distance** 230 **between point mutations**

231 The DNA helicases, Fml1 and Rqh1, are also prime candidates for modulating recombination  
232 frequency at intragenic intervals of different lengths (Lorenz et al. 2012; Cromie, Hyppa, and Smith  
233 2008). However, Fml1 apparently does not modulate intragenic recombination levels, as at all  
234 intragenic intervals tested, *fml1*Δ is similar to wild type (Figure 3A-B, Figure 3-figure supplement 1A).  
235 In contrast, the RecQ-family DNA helicase Rqh1 is required for wild-type levels of intragenic  
236 recombination (Lorenz et al. 2012). The deletion of *rqh1* reduces intragenic recombination frequency  
237 to about a third of wild-type percentage at short (*ade6-M216*×*ade6-3083*, *ade6-3049*×*ade6-469*)

238 intervals, and to about a tenth of wild-type frequency at the long *ade6-3083*×*ade6-469* interval  
239 (Figure 3A-B, Figure 3-figure supplement 1).

240 As with long intervals (Lorenz et al. 2012) *fml1*Δ results in a ~10 percentage point increase of  
241 CO frequency among intragenic recombination events at short intervals (Figure 3C-D, Figure 3-figure  
242 supplement 1). The absence of Rqh1 induces moderate increases in CO levels among intragenic  
243 recombination events at the 85bp *ade6-M216*×*ade6-3083* and the 1,3520bp *ade6-3083*×*ade6-469*  
244 interval, which are not statistically significant (Figure 3C-D). However, at the 254bp *ade6-*  
245 *3049*×*ade6-469* interval CO frequency among *ade6*<sup>+</sup> events is raised by 17 percentage points in  
246 *rqh1*Δ ( $p=3.72\times 10^{-9}$  against wild type, two-tailed Mann-Whitney U) (Figure 3-figure supplement 1).  
247 Because *ade6-3083* is a more complex allele than *ade6-3049* (see Discussion), this potentially  
248 indicates that Fml1 can drive NCO pathway(s) independently of the complexity of the underlying  
249 DNA sequence, whereas Rqh1 can fulfill this role only at simple *ade6* alleles with a single substitution  
250 mutation. Overall, these data show that Fml1 has no role in modulating intragenic recombination  
251 levels, but drives NCO formation downstream after successful strand invasion and DNA synthesis.  
252 Rqh1 promotes intragenic recombination, but also has moderate anti-recombinogenic activity in CO  
253 formation among intragenic recombination events.

254

### 255 **The “fertile range” of fission yeast lies between 11°C and 33°C**

256 Bomblies and coworkers recently noted that to understand the extent to which temperature affects  
257 meiotic recombination, it is important to know the “fertile range” of the tested species; otherwise the  
258 results will be skewed by including temperatures outside the “fertile range” or omitting temperatures  
259 within it (Lloyd et al. 2018). We set up matings of prototrophic fission yeast strains (ALP714×ALP688)  
260 in a temperature range between +4°C and +35°C on sporulation media. Matings were checked  
261 regularly until asci containing spores were observed, or, if not, the experiment was abandoned after  
262 30 days. No asci were observed at +4°C and at +35°C after one month of incubation, putting the  
263 “fertile range” of *Sz. pombe* somewhere between these two temperatures. Indeed, mating at 11°C  
264 resulted in the formation of asci containing spores within 2 weeks, at 16°C within 1 week, at 20°C  
265 within 5 days, at 25°C and 30°C within 3 days, and at 33°C within 2 days. Sporulation efficiency was  
266 calculated as the percentage of asci containing spores in a given population of cells after the  
267 indicated time at each temperature. Sporulation efficiency was ~25% at all temperatures, except at  
268 11°C when it was only ~5% (Figure 4A).

269 During the following meiotic recombination assays performed at 11°C, 16°C, 20°C, 25°C,  
270 30°C and 33°C (“fertile range”), we also monitored spore viability by random spore analysis. At all  
271 temperatures tested, spore viability was ~60% (Figure 4B), indicating that at 11°C when sporulation  
272 is comparably inefficient (Figure 4A), the spores that developed did not suffer from decreased  
273 viability.

274

### 275 **Meiotic intragenic recombination levels vary greatly within the “fertile range”**

276 To assess whether temperature alters meiotic recombination outcome, assays were performed at  
277 temperatures within the “fertile range”. We tested five different combinations of *ade6* heteroalleles:  
278 two large intragenic intervals containing a strong hotspot allele (*ade6-3083*×*ade6-469*, 1,320bp &  
279 *ade6-M216*×*ade6-3049*, 1,168bp), one large intragenic interval containing a weak hotspot allele  
280 (*ade6-M375*×*ade6-469*, 1,335bp), and two small intragenic intervals containing a strong hotspot  
281 allele (*ade6-M216*×*ade6-3083*, 85bp & *ade6-3049*×*ade6-469*, 254bp). The frequency of intragenic  
282 recombination is considerably lower at colder temperatures (11°C, 16°C and 20°C), and tends to  
283 plateau between 25°C and 33°C (Figure 4C-E). One of the large intervals (*ade6-3083*×*ade6-469*)  
284 displayed a distinct peak at 30°C ( $p=2.67\times 10^{-11}$  25°C vs. 30°C,  $p=2.6\times 10^{-5}$  30°C vs. 33°C; two-tailed  
285 Mann-Whitney U test). Intriguingly, the fold-change in intragenic recombination frequency between  
286 16°C (lowest temperature tested in all intervals) and the temperature producing the highest  
287 intragenic recombination frequency is substantially lower in the cross with the weak *ade6-M375*

288 hotspot (2.7-fold) than in the crosses containing a strong hotspot allele (5-fold to 11-fold)  
289 (Supplementary File 1-Table S4). This also holds true if intragenic recombination frequency is  
290 compared between 16°C and 25°C (the mating temperature generally used for this type of  
291 experiment): 2.4-fold change in *ade6-M375×ade6-469* vs. a 4.3- to 6.6-fold change in the crosses  
292 containing a strong hotspot allele (Supplementary File 1-Table S4). The very short *ade6-*  
293 *M216×ade6-3083* intragenic interval (85bp) shows a stronger fold-change over temperature (6.6-  
294 fold at 16°C vs. 25°C), than the longer intervals containing a hotspot allele (254bp – 1,320bp; 4.3-  
295 to 4.8-fold at 16°C vs. 25°C) (Supplementary File 1-Table S4). This suggests, (I) that, as a general  
296 trend, lower temperatures reduce the frequency of intragenic recombination regardless of physical  
297 distance between *ade6* mutations, (II) that intragenic recombination at weak hotspots is less  
298 sensitive to temperature changes than intragenic recombination at strong hotspots, and (III) that  
299 intragenic recombination at very short intervals is singularly susceptible to temperature changes.

### 300 301 **Meiotic CO frequency varies moderately within the “fertile range”**

302 Given that major changes in intragenic recombination levels are observed across temperatures, we  
303 were surprised to find that overall CO levels and CO frequencies among intragenic events were less  
304 sensitive to temperature changes. The frequency of COs between *ura4+-aim2* and *his3+-aim* are  
305 not substantially altered as crossing temperature changes (Figure 4-figure supplement 1). In all  
306 intervals tested CO frequency in the total population is only significantly lower at the temperatures  
307 of 11°C and 16°C, but then plateaus at 20°C and higher (Figure 4-figure supplement 1A-C; Tukey’s  
308 Honest Significant Differences). CO frequency among intragenic *ade6+* events was even more stable  
309 with temperature changes. The weak hotspot cross *ade6-M375×ade6-469* was completely unfazed  
310 by temperature changes ( $p=0.314$ , Kruskal-Wallis test). The crosses at cold temperatures (11°C,  
311 16°C & 20°C) in all the other intervals displayed a moderate tendency to higher CO percentages  
312 than crosses at 30°C or 33°C (Figure 4-figure supplement 1; Tukey’s Honest Significant Differences).  
313 The latter observation could indicate a mechanism like CO homeostasis at work (Martini et al. 2006;  
314 Kan, Davidson, and Wahls 2011).

### 315 316 **Meiotic DSB levels do not appear to change with temperature**

317 Following the observation that temperature modulates meiotic recombination outcome, we next  
318 sought to pinpoint which specific steps during meiotic recombination are sensitive to temperature  
319 changes. Therefore, we assessed whether DSB formation is likely disturbed using the cytological  
320 markers Rec7-GFP and Rad11-GFP. Rec7 (Rec114 in *S. cerevisiae*), one of the co-factors essential  
321 for Spo11 recruitment and function (Miyoshi, Ito, and Ohta 2013), can be detected on meiotic  
322 chromatin and is considered a marker for DSB initiation sites (Lorenz et al. 2006). As part of RPA  
323 (replication protein A) Rad11 becomes associated with the single-stranded DNA exposed by strand  
324 resection following removal of Spo11, and is thus a marker for DSB formation (Parker et al. 1997).  
325 Rec7- and Rad11-focus numbers enable us to assess meiotic DSB levels indirectly. For Rec7- and  
326 Rad11-focus counts, linear elements outlined by myc-tagged Hop1 were used to identify meiotic  
327 prophase I nuclei in chromatin spreads from meiotic time-courses (Lorenz et al. 2004; Brown,  
328 Jarosinska, and Lorenz 2018; Loidl and Lorenz 2009). We chose to perform these experiments at  
329 the extreme temperatures of the “fertile range” (16°C and 33°C), which were still producing high  
330 sporulation efficiency and significantly different recombination frequencies (Figure 4).

331 Based on previous observations that recombination markers are most abundant in the thread  
332 and network stage of linear element formation (Lorenz et al. 2006), we selectively counted foci at  
333 these stages. On average between ~16 foci of both Rec7-GFP and Rad11-GFP per nucleus were  
334 observed at 16°C and 33°C (Figure 5A-B). The Rec7-GFP focus count was actually somewhat higher  
335 at the lower temperature (18.2 at 16°C vs. 14.1 at 33°C,  $p=0.0017$ , two-tailed Mann-Whitney U test),  
336 whereas the Rad11-GFP focus numbers were indiscernible between 16°C (15.9 foci/nucleus) and  
337 33°C (16.2 foci/nucleus) (Supplementary File 1-Table S5;  $p=0.794$ , two-tailed Mann-Whitney U test).



338           These experiments suggest that overall DSB formation is largely unaltered between 16°C  
339 and 33°C, because any subtle changes observed are unlikely to explain the lowered recombination  
340 frequencies at cold temperatures.

341

### 342 **Processing of DSBs is potentially altered by temperature**

343 Rqh1 and Exo1 function in long-range strand resection in mitotic and meiotic cells in fission yeast  
344 (Langerak et al. 2011; Osman et al. 2016). Sfr1 forms a complex with Swi5 to support strand  
345 exchange, thereby promoting meiotic recombination (Haruta et al. 2006; Lorenz et al. 2012). Less  
346 efficient DSB processing and/or strand exchange could potentially explain why recombination levels  
347 are reduced at colder temperatures. The expectation would be that mutants defective in strand  
348 resection or strand exchange would be more sensitive to temperature changes than wild type (i.e.,  
349 a synergistic effect of mutational and environmental weakening of these processes). Therefore,  
350 meiotic recombination outcome in *ade6-3083*×*ade6-469* crosses of *rqh1*Δ, *exo1*Δ, and *sfr1*Δ single  
351 mutants performed at 16°C and 25°C was determined. The fold difference in intragenic  
352 recombination frequency between 16°C and 25°C for wild type and each deletion was calculated to  
353 assess whether the reduction in intragenic recombination at cold temperatures is epistatic or  
354 synergistic with deleting *rqh1*, *exo1*, or *sfr1*. In wild-type crosses intragenic recombination is 4.3-fold  
355 lower at 16°C compared to 25°C ( $p=6.428\times 10^{-12}$ , two-tailed Mann-Whitney U test). However, in  
356 *rqh1*Δ, *exo1*Δ, and *sfr1*Δ crosses intragenic recombination levels are 7.2-fold ( $p=1.402\times 10^{-9}$ , two-  
357 tailed Mann-Whitney U test), 7.1-fold ( $p=4.665\times 10^{-11}$ , two-tailed Mann-Whitney U test), and 7.9-fold  
358 ( $p=6.265\times 10^{-7}$ , two-tailed Mann-Whitney U test) lower at 16°C than at 25°C, respectively (Figure 6).  
359 The fold changes in overall CO frequency and CO levels among *ade6*<sup>+</sup> recombinants are largely  
360 unchanged or do not follow an obvious pattern (Supplementary File 1-Table S4). Long-range strand  
361 resection and the action of strand exchange factors are potentially important for maintaining  
362 intragenic recombination frequency especially at colder temperatures, indicating that these  
363 processes possibly are temperature-sensitive.

364

## 365 **Discussion**

### 366 **Differences in the DNA sequences of the homologs affect recombination**

367 We used a genetic recombination assay with *ade6* as central marker gene to determine whether  
368 different distances between polymorphisms (intragenic interval) influence intragenic and intergenic  
369 recombination outcome (Figure 1). This potentially has implications for how we think about meiotic  
370 recombination. Rather than simple gene conversions at single loci, which are thought to primarily  
371 arise from mismatch repair or from DNA synthesis during DSB repair (Holliday 2007), intragenic  
372 recombination events involving two distinct point mutations on the homologs have the additional  
373 possibility of being caused by intragenic COs (Figure 1-figure supplement 1). This would imply that  
374 the occurrence of a CO between two point mutations is more likely the longer the distance between  
375 the two heteroalleles is, and that this will result in an intragenic event with a higher probability. This,  
376 admittedly, exposes a rather blurred boundary between what constitutes a bifactorial GC event  
377 associated with a CO and what an intragenic CO event. The three mechanisms of GC formation  
378 (mismatch repair, DNA synthesis during DSB repair, and intragenic COs) are not mutually exclusive,  
379 but to a degree even presuppose each other.

380           The observed effects for different parental and recombinant classes amongst progeny having  
381 undergone a meiotic intragenic recombination event can be explained by envisioning a DSB 5' or 3'  
382 of a point mutation leading to a recombination intermediate (D-loop, Holliday junction), which will  
383 then be processed immediately at the break site, or ends up somewhat removed from the initial  
384 break site by multiple consecutive invasion steps, by branch migration, or both (Farah, Cromie, and  
385 Smith 2009; Piazza, Wright, and Heyer 2017; Marsolier-Kergoat et al. 2018). The genetic makeup  
386 of the progeny is, therefore, a compound result of processing distinct recombination intermediates

387 in different ways. The genetic composition of wild-type and mutant progeny resulting from the meiotic  
388 recombination assays can be explained as different combinations of scenarios suggested previously  
389 (Lorenz et al. 2014). For example, recombination between *ade6-3083* and *ade6-M216*, which gives  
390 rise to mainly Ade<sup>+</sup> His<sup>+</sup> Ura<sup>-</sup> NCOs and Ade<sup>+</sup> His<sup>-</sup> Ura<sup>-</sup> COs, may be explained by the model in Figure  
391 7A. In this model, a bias in favour of Ade<sup>+</sup> His<sup>-</sup> Ura<sup>-</sup> COs stems from strand exchange/branch  
392 migration being constrained to within the region defined by the *ade6-3083* – *ade6-M216* interval and  
393 resolution of the recombination intermediate occurring by D-loop cleavage (Figure 7A, C). Ade<sup>+</sup> His<sup>+</sup>  
394 Ura<sup>-</sup> NCOs and additional Ade<sup>+</sup> His<sup>-</sup> Ura<sup>-</sup> COs come from HJ resolution (Figure 7A, C). However,  
395 certain mutant situations can dramatically alter the outcome, e.g. recombination at *ade6-*  
396 *M216*×*ade6-3083* in *mutS $\alpha$ -mutL $\alpha$*  mutants leads to relatively few Ade<sup>+</sup> His<sup>-</sup> Ura<sup>-</sup> COs and a big  
397 increase in the proportion of Ade<sup>+</sup> His<sup>+</sup> Ura<sup>+</sup> COs (Figure 2, Figure 2-figure supplement 3). We  
398 considered whether this might have something to do with the complexity of the *ade6-3083* allele,  
399 which consists of multiple substitution mutations and can potentially form a C/C-mismatch in the  
400 heteroduplex DNA during strand exchange that is less efficiently repaired during meiosis than other  
401 mismatches (Schär and Kohli 1993). However, a moderate shift of CO recombinant classes among  
402 intragenic events can also be seen at the small *ade6-149*×*ade6-3049* interval (Figure 2-figure  
403 supplement 3). Unlike *ade6-3083*, *ade6-3049* contains only a single nucleotide difference (Figure 1-  
404 table supplement 2) and, therefore, the complexity of a given *ade6* allele is unlikely to be the critical  
405 factor affecting the shift in CO recombinant class. Instead, we think that a deficit in heteroduplex  
406 rejection and mismatch repair, caused by loss of *msh2*, could result in strand exchange/branch  
407 migration extending beyond the non-hotspot mutation (i.e. *ade6-M216* or *ade6-149*) prior to D-loop  
408 cleavage/HJ resolution, and the base-pair mismatches in the recombinant chromosomes remaining  
409 unrepaired. Together, these altered features could explain the increase in Ade<sup>+</sup> His<sup>+</sup> Ura<sup>+</sup> COs at the  
410 *ade6-M216*×*ade6-3083* and *ade6-149*×*ade6-3049* intervals in *mutS $\alpha$ -mutL $\alpha$*  mutant crosses (Figure  
411 7B, C).

412 Recombination outcome in a *msh2*Δ in *S. cerevisiae* has also been shown to be more  
413 complex than in wild type (Martini et al. 2011; Cooper et al. 2018). Intriguingly, in *S. cerevisiae* the  
414 action of Msh2 seems to be restricted to class I COs, which are subjected to CO interference,  
415 whereas Mus81-dependent class II COs are unchanged in *msh2*Δ (Cooper et al. 2018). *Sz. pombe*  
416 operates only a class II CO pathway via Mus81-processing, completely lacking a class I CO pathway.  
417 Nevertheless, the absence of Msh2 in fission yeast has a profound effect on CO frequency, and the  
418 way recombination intermediates are processed (Figure 2).

419 FANCM- and RecQ-family DNA helicases/translocases are implicated in regulating meiotic  
420 recombination outcome in several different organisms (Lorenz et al. 2012; Crismani et al. 2012; De  
421 Muyt et al. 2012; Cromie, Hyppa, and Smith 2008; Hatkevich et al. 2017; Lukaszewicz, Howard-Till,  
422 and Loidl 2013). In *Sz. pombe* Fml1 has been shown to specifically limit CO formation during the  
423 late CO/NCO-decision (Lorenz et al. 2012). Fml1 acts as a promotor of NCOs, likely by driving late  
424 recombination intermediates into the SDSA pathway, after strand invasion and DNA synthesis has  
425 happened. In accordance with this, absence of *fml1* leads to an increase in CO among intragenic  
426 *ade6*<sup>+</sup> events, but has little effect on intragenic recombination itself (Figure 3, Figure 3-figure  
427 supplement 1) (Lorenz et al. 2012). This role is independent of the size of the intragenic interval, with  
428 Fml1 driving 10-12% of NCO recombination in any case. The deletion of *rqh1* has a very strong  
429 meiotic phenotype, leading to reductions in intragenic recombination, CO, and spore viability (Figure  
430 3, Figure 3-figure supplement 1). This on its own would indicate an early role in promoting strand  
431 exchange and/or DSB resection, but then Rqh1 is capable of promoting NCO formation among *ade6*<sup>+</sup>  
432 events at some intragenic intervals (Figure 3, Figure 3-figure supplement 1). Most likely this is due  
433 to Rqh1 actually performing the following functions: (I) promotion of interhomolog recombination  
434 events, probably in cooperation with Rad55-57 and Rlp1-Rdl1-Sws1, but independently of Sfr1-Swi5  
435 (Lorenz et al. 2014), potentially also by providing longer resection tracts (Osman et al. 2016); (II)

436 dismantling D-loops, this enables the release of break ends to search for homology elsewhere, starts  
437 cycles of multiple consecutive invasion steps, and provides opportunities for Fml1 to drive NCO  
438 formation via SDSA; and (III) branch migration of established D-loops and Holliday junctions, thereby  
439 promoting heteroduplex DNA formation further away from the break site (Cromie, Hyppa, and Smith  
440 2008).

#### 441 442 **Environmental temperature influences recombination outcome**

443 The environmental temperature regime during crossing affects meiotic recombination outcome in  
444 fission yeast, while DSB levels appear to be maintained across temperatures in the “fertile range”  
445 (Figures 4, 5). Steps in the meiotic recombination pathway that are downstream of DSB formation,  
446 such as strand resection and/or strand exchange are likely impaired at colder temperatures (Figure  
447 6). Especially, intragenic recombination frequency shows strong changes with temperature within  
448 the “fertile range”, whereas overall COs and COs among intragenic events are less affected (Figure  
449 4, Figure 4-figure supplement 1). Recombination monitored at non-hotspot alleles only are less  
450 sensitive to temperature changes than those involving a hotspot (Supplementary File 1-Table S4);  
451 this could be a manifestation of CO invariance suggested to explain a stronger drive towards  
452 interhomolog recombination at non-hotspots (Hyppa and Smith 2010). CO changes over  
453 temperature do definitely not follow a U-shape curve like in *Drosophila* or *Arabidopsis* (Plough 1917;  
454 Lloyd et al. 2018), where CO recombination is highest at the more extreme temperatures within the  
455 “fertile range”. Similar to *C. elegans* (Rose and Baillie 1979) CO rates tend to be lower at low  
456 temperatures (Figure 4-figure supplement 1). In *Hordeum vulgare* (barley) and *S. cerevisiae* CO  
457 position, rather than overall frequency, changes with temperature (Higgins et al. 2012; Zhang et al.  
458 2017). In *S. cerevisiae* this has largely been explained by differential activation of DSB hotspots at  
459 different temperatures (Zhang et al. 2017). However, in contrast to *S. cerevisiae* where the location  
460 of DSBs is maintained in only ~20% of cases between temperatures (14°C, 30°C, and 37°C) (Zhang  
461 et al. 2017), in *Sz. pombe* this is true for ~70% of DSB sites (Hyppa et al. 2014). It is thus unlikely  
462 that changes of recombination frequency due to differential hotspot activation over temperature is a  
463 major contributing factor in *Sz. pombe*. Considering that overall CO frequency is only moderately  
464 affected by temperature, whereas intragenic recombination rates change massively, a switch from  
465 interhomolog to intersister recombination will unlikely be a key contributing factor, since this would  
466 affect intergenic COs and intragenic recombination to an equal extent. Processes directly  
467 downstream of DSB formation, such as strand invasion and stabilisation of strand exchange, are  
468 temperature-sensitive (Figure 6), and are seemingly a major cause for low intragenic recombination  
469 frequency at low temperatures.

#### 470 471 **Concluding remarks**

472 Factors directly involved in generating CO and NCO recombinants during meiosis have been  
473 identified and characterized in recent years (Osman et al. 2003; De Muyt et al. 2012; Lorenz et al.  
474 2012; Lukaszewicz, Howard-Till, and Loidl 2013; Crismani et al. 2012), and several inroads have  
475 been made in understanding how template choice is regulated and executed during meiotic  
476 recombination in standard laboratory conditions (Hong et al. 2013; Lorenz et al. 2014). However, we  
477 still only have a basic understanding of how underlying DNA sequence polymorphisms and  
478 environmental parameters influence meiotic recombination outcomes. Here, we demonstrate that  
479 specific DNA sequence differences between the two homologs strongly impact on which outcome is  
480 achieved, and that this is largely driven by the action of the MutS-MutL complex. Other important  
481 determinants influencing meiotic recombination outcome are environmental factors, such as  
482 temperature. Temperature changes within the “fertile range” of a species grossly affects intra- and  
483 intergenic recombination levels in several species (Plough 1917; Rose and Baillie 1979; Bomblies,  
484 Higgins, and Yant 2015; Lloyd et al. 2018), likely by changing the positioning of the initial DSB  
485 (Higgins et al. 2012; Zhang et al. 2017) and/or dynamics of DSB repair (Modliszewski et al. 2018;

486 this study). This highlights the importance of the interplay between intrinsic and environmental  
487 parameters in shaping the genetic diversity of a given population.  
488

## 489 **Material and methods**

### 490 **Bacterial and yeast strains and culture conditions**

491 *E. coli* strains were grown on LB and SOC media – where appropriate containing 100 µg/ml Ampicillin  
492 (Sambrook and Russell 2000). Competent cells of *E. coli* strains NEB10<sup>®</sup>-beta (New England  
493 BioLabs Inc., Ipswich, MA, USA), and XL1-blue (Agilent Technologies, Santa Clara, CA, USA) were  
494 transformed following the protocols provided by the manufacturers. *Schizosaccharomyces pombe*  
495 strains used for this study are listed in Supplementary File 2. Yeast cells were cultured on yeast  
496 extract (YE), and on yeast nitrogen base glutamate (YNG) agar plates containing the required  
497 supplements (concentration 250 mg/l on YE, 75 mg/l on YNG). Crosses were performed on malt  
498 extract (ME) agar containing supplements at a final concentration of 50 mg/l (Sabatinos and  
499 Forsburg 2010).

500 Different *ade6* hotspot and non-hotspot sequences (Figure 1-table supplement 2) were  
501 introduced by crossing the respective mutant *ade6* strain with *ade6*<sup>+</sup> strains carrying the *ura4*<sup>+</sup> and  
502 *his3*<sup>+</sup> artificially introduced markers (aim) (UoA95, UoA96, UoA97, UoA98) (Osman et al. 2003). The  
503 point mutations in the *ade6* alleles were verified by Sanger DNA sequencing (Source BioScience,  
504 Nottingham, UK) (Figure 1-table supplement 2).

505 Using an established marker swap protocol (Sato, Dhut, and Toda 2005) the *natMX6*-marked  
506 *rqh1Δ-G1* was derived from an existing *rqh1Δ::kanMX6* allele (Doe et al. 2002), creation of the  
507 *natMX6*-marked *pms1-16* insertion mutant allele has been described previously (Lorenz 2015).

508 Marker cassettes to delete *msh3*, and *msh6*, and to partially delete *msh2* were constructed  
509 by cloning targeting sequences of these genes into pFA6a-*kanMX6*, pAG25 (*natMX4*), and pAG32  
510 (*hphMX4*), respectively, up- and downstream of the dominant drug resistance marker (Bähler et al.  
511 1998; Goldstein and McCusker 1999). The targeting cassettes were released from the relevant  
512 plasmids (pALo130, pALo132, pALo134) by a restriction digest, and transformed into the strains  
513 FO652 (*msh2* and *msh6*) and ALP729 (*msh3*). For specifics of strain and plasmid construction  
514 please refer to Supplementary File 3. Plasmid sequences are available on figshare  
515 (<https://figshare.com/s/ad72dbfe07a261fd4ee4>). Epitope tagging of *hop1*<sup>+</sup> with a C-terminal 13myc-  
516 *kanMX6* tag has been described in detail (Brown, Jarosinska, and Lorenz 2018).

517 Transformation of yeast strains was performed using an established lithium-acetate  
518 procedure (Brown and Lorenz 2016). All plasmid constructs were verified by DNA sequencing  
519 (Source BioScience plc, Nottingham, UK).

520 All DNA modifying enzymes (high-fidelity DNA polymerase Q5, restriction endonucleases,  
521 T4 DNA ligase) were supplied by New England BioLabs. Oligonucleotides were obtained from  
522 Sigma-Aldrich Co. (St. Louis, MO, USA).

### 524 **Genetic and cytological assays**

525 Determination of spore viability by random spore analysis and the meiotic recombination assay have  
526 been previously described in detail (Osman et al. 2003; Sabatinos and Forsburg 2010).

527 Genomic DNA of Ade- Ura+ His+ progeny from an *ade6-3083×ade6-469* (ALP733×ALP731)  
528 cross was used to PCR-amplify the *ade6* locus (oligonucleotides oUA219 5'-  
529 AAAGTTGCATTTTACAATGC-3' and oUA66 5'-GTCTATGGTCGCCTATGC-3') for Sanger sequencing  
530 (Eurofins Scientific, Brussels, Belgium) with oUA219, oUA66, or nested oligonucleotides oUA779 5'-  
531 CTCATTAAGCTGAGCTGCC-3' and oUA780 5'-AAGCTCTCCATAGCAGCC-3'.

532 Meiotic time-courses and preparation of chromatin spreads were in essence performed as  
533 described previously (Loidl and Lorenz 2009), except for the use of 100 mg/ml Lallzyme MMX  
534 (Lallemand Inc., Montréal, Canada) as the only cell-wall digesting enzyme in the spheroplasting  
535 solution of the chromatin spread protocol (Flor-Parra et al. 2014). Immunostaining was performed



536 according to an established protocol (Loidl and Lorenz 2009) using polyclonal rabbit  $\alpha$ -myc (ab9106;  
537 Abcam PLC, Cambridge, UK) at a 1:500 dilution and monoclonal rat  $\alpha$ -GFP [3H9] (ChromoTek  
538 GmbH, Planegg-Martinsried, Germany) at a 1:100 dilution as primary antibodies. Antibody-bound  
539 protein was visualized using donkey  $\alpha$ -rabbit IgG AlexaFluor-555 (ab150062; Abcam) and donkey  
540  $\alpha$ -rat IgG AlexaFluor-488 (ab150153; Abcam), both at a 1:500 dilution, as secondary antibodies  
541 conjugated to fluorophores. DNA was stained by Hoechst 33342 (Molecular Probes, Eugene, OR,  
542 USA) at a final concentration of 1  $\mu$ g/ml.

543 Analysis was performed on a Zeiss Axio Imager.M2 (Carl Zeiss AG, Oberkochen, Germany)  
544 epifluorescence microscope equipped with the appropriate filter sets to detect red, green, and blue  
545 fluorescence. Black-and-white images were taken with a Zeiss AxioCam MRm CCD camera  
546 controlled by AxioVision 40 software v4.8.2.0. Images were pseudo-coloured and overlaid using  
547 Adobe Photoshop CC (Adobe Systems Inc., San José, CA, USA).

548 For Rec7-GFP and Rad11-GFP focus counts, images of meiotic prophase I nuclei, as  
549 identified by the presence of Hop1-13myc linear elements at the thread and network stages (Lorenz  
550 et al. 2006), were captured as described using the above antibodies. Individual images were  
551 acquired for each channel to detect Hop1-13myc, either Rec7-GFP or Rad11-GFP, and the DNA  
552 stain Hoechst 33342. Single image channels were merged, and all GFP-positive foci counted within  
553 the area defined by the Hoechst 33342 staining using the “count” function in Adobe Photoshop CC.  
554

## 555 **Data presentation and Statistics**

556 Raw data is available on figshare (<https://figshare.com/s/ad72dbfe07a261fd4ee4>). Line graphs were  
557 produced using Microsoft Excel 2016 (version 16.0.4638.1000, 32-bit), and scatter plots were  
558 generated in GraphPad Prism 5 for Windows (version 5.04). Box-and-whisker plots were created in  
559 R (version i386, 3.0.1) (<http://www.r-project.org/>) (Lorenz et al. 2014). R was also used to compute  
560 Kruskal-Wallis test and Tukey’s Honest Significant Differences employing the `kruskal.test()` and  
561 `TukeyHSD()` functions, respectively. Mann-Whitney U tests were performed as previously described  
562 (Lorenz et al. 2014).  
563

## 564 **Acknowledgments**

565 We are grateful to Jürg Bähler, Miguel G. Ferreira, Edgar Hartsuiker, Franz Klein, Jürg Kohli, Josef  
566 Loidl, Kim Nasmyth, Fekret Osman, Gerald R. Smith, Walter W. Steiner, and the National  
567 BioResource Project (NBRP) Japan for providing materials, and to C. Bryer, A. Mehats, and H.  
568 Rickman for technical assistance. This work was supported by the Biotechnology and Biological  
569 Sciences Research Council UK (BBSRC) [grant numbers BB/F016964/1, BB/M010996/1], the  
570 University of Aberdeen (College of Life Sciences and Medicine Start-up grant to AL), and the  
571 Wellcome Trust (Programme grant to MCW) [grant number 090767/Z/09/Z].  
572

## 573 **Author contributions**

574 SDB: conception and design, unpublished essential reagents (yeast strains, plasmids), acquisition  
575 of data, analysis and interpretation of data, revising the manuscript; MNA, MJ, CA, SJM: acquisition  
576 of data, revising the manuscript; MCW: analysis and interpretation of data, revising the manuscript;  
577 AL: conception and design, unpublished essential reagents (yeast strains, plasmids), acquisition of  
578 data, analysis and interpretation of data, drafting and revising the manuscript.  
579

580

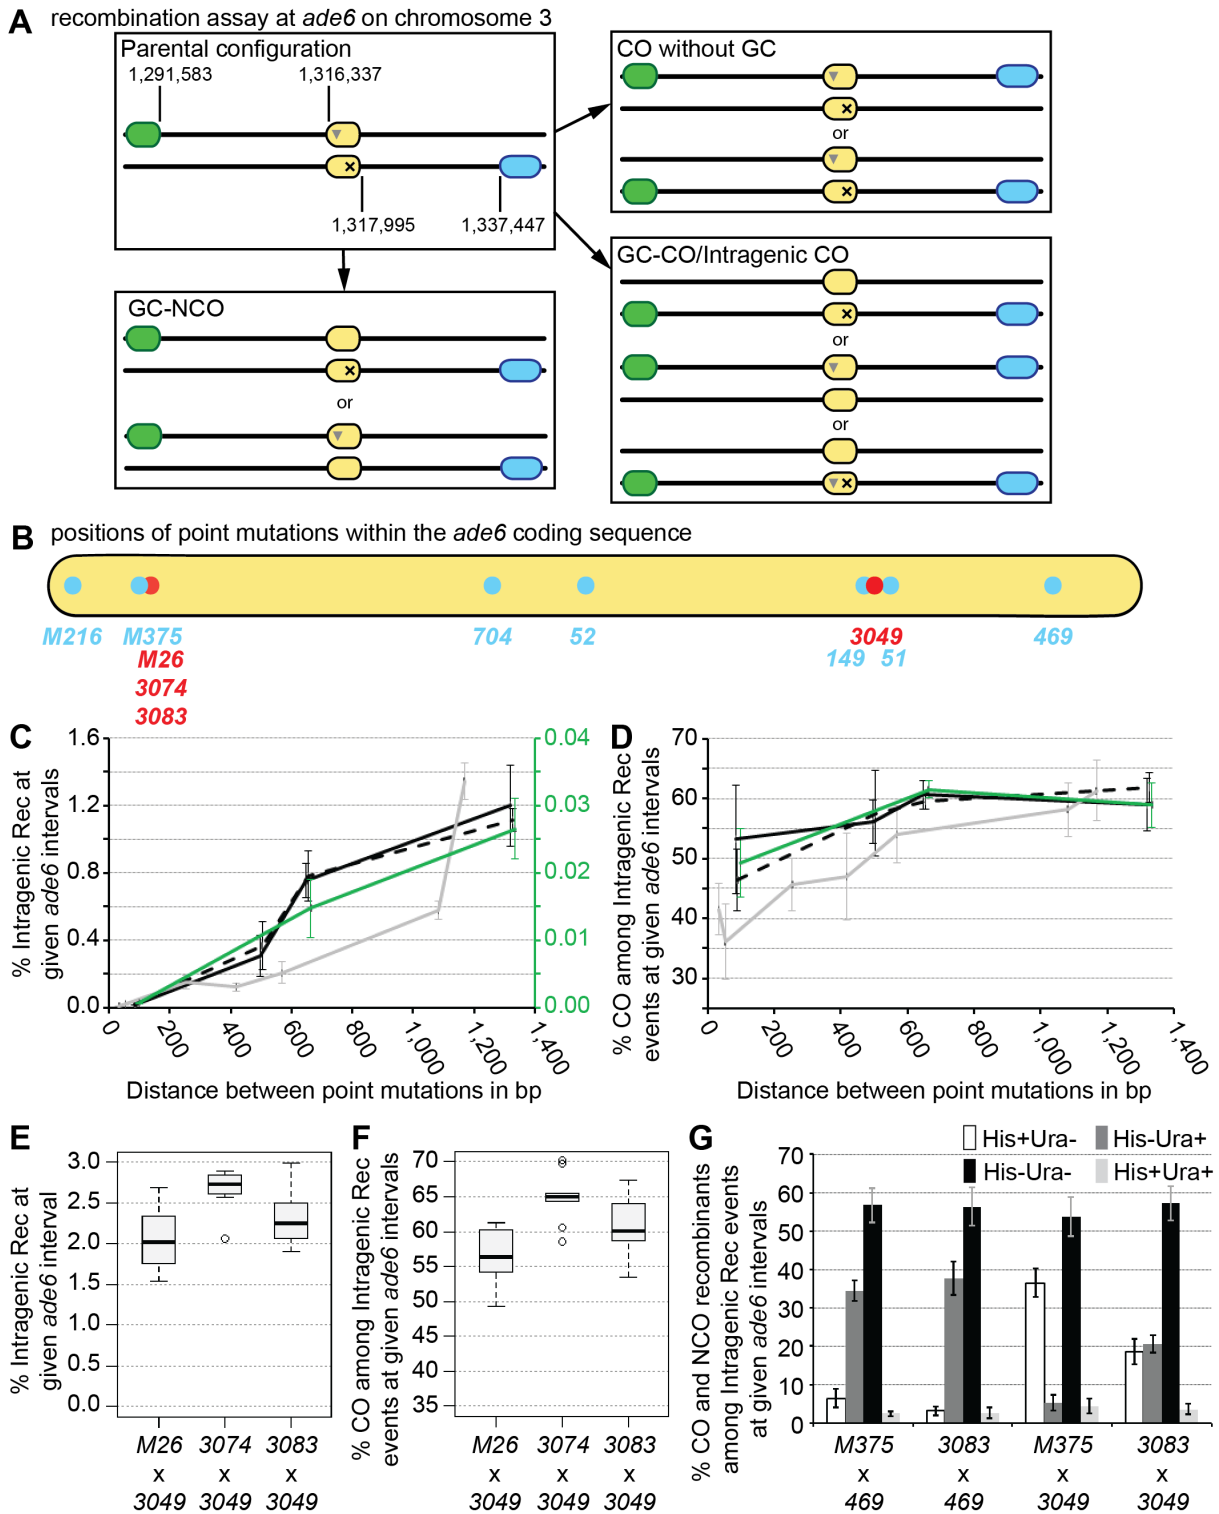

581

582

583

584

585

586

587

588

589

590

591

592

**Figure 1.** Physical distance between heteroalleles in *ade6* influences frequency of intragenic recombination (Intragenic Rec) and associated crossovers (COs). **(A)** Schematic showing the meiotic recombination assay at *ade6* (yellow) and its common outcomes. *ade6*<sup>+</sup> recombinants can arise via gene conversion (GC) associated with a crossover (GC-CO) or a non-crossover (GC-NCO), alternatively intragenic COs can directly generate an *ade6*<sup>+</sup> outcome. The positions of *ade6*, and the artificially introduced markers *his3*<sup>+</sup>-*aim* (light blue) and *ura4*<sup>+</sup>-*aim2* (green) on chromosome 3 are indicated [in bps]. Positions of point mutations are shown as ▼ and ×. **(B)** Schematic of the *ade6* coding sequence indicating the point mutations and their positions (approximately to scale) used in the recombination assays, hotspots are indicated in red, and non-hotspots in light blue. **(C)** Frequency of intragenic recombination and **(D)** frequency of CO among intragenic recombination events at *ade6* in wild type over distance between point mutations: crosses involving hotspot *ade6*-

593 3083 as black solid line, UoA110×UoA100 (n=12), ALP733×UoA115 (n=12), ALP733×UoA119  
594 (n=5), ALP733×ALP731 (n=20); crosses involving hotspot *ade6-3074* as black dashed line,  
595 UoA106×UoA100 (n=12), UoA104×UoA115 (n=12), UoA104×UoA119 (n=6), UoA104×ALP731  
596 (n=10); crosses involving hotspot *ade6-3049* as grey line, UoA122×UoA497 (n=6), UoA120×UoA463  
597 (n=6), UoA120×ALP731 (n=31), UoA116×UoA123 (n=12), UoA112×UoA123 (n=12),  
598 ALP1541×UoA123 (n=12), UoA99×UoA123 (n=12); and crosses involving non-hotspot *ade6-M375*  
599 as green line – needs to be read from the green secondary y-axis in (C), UoA861×UoA100 (n=6),  
600 ALP1541×UoA119 (n=6), ALP1541×ALP731 (n=16). **(E)** Frequency of intragenic recombination and  
601 **(F)** frequency of CO among intragenic recombination events at *ade6* in wild type crosses involving  
602 hotspot alleles only: FO1285×UoA123 (n=12), UoA104×UoA123 (n=9), and ALP733×UoA123 (n=9).  
603 **(G)** Distribution of non-crossover (NCO) and crossover (CO) classes among intragenic  
604 recombination events in wild type at *ade6*; ALP1541×ALP731 (n=16), ALP733×ALP731 (n=20),  
605 ALP1541×UoA123 (n=12), ALP733×UoA123 (n=9). n indicates the number of independent crosses.  
606 For details of data see Supplementary File 1-Table S1.  
607

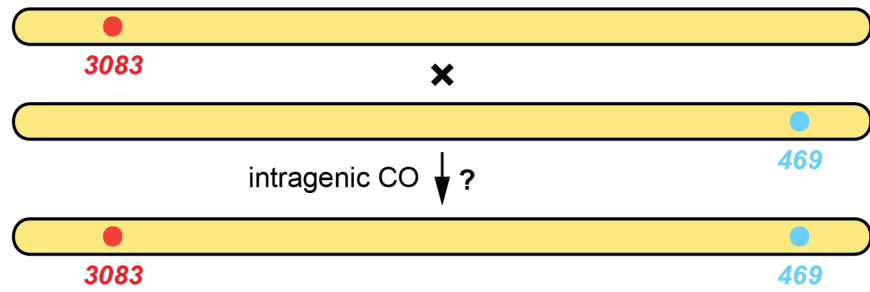

*ade6* sequence of 32 Ade<sup>-</sup> Ura<sup>+</sup> His<sup>+</sup> progeny from cross ALP733 (*ade6-3083*) × ALP731 (*ade6-469*)

| colony number | 5' end      | 3' end     |
|---------------|-------------|------------|
| 1             | <b>3083</b> | <b>wt</b>  |
| 2             | <b>wt</b>   | <b>469</b> |
| 3             | <b>3083</b> | <b>wt</b>  |
| 4             | <b>wt</b>   | <b>469</b> |
| 5             | <b>wt</b>   | <b>469</b> |
| 6             | <b>wt</b>   | <b>469</b> |
| 7             | <b>wt</b>   | <b>469</b> |
| 8             | <b>wt</b>   | <b>469</b> |
| 9             | <b>wt</b>   | <b>469</b> |
| 10            | <b>3083</b> | <b>wt</b>  |
| 11            | <b>wt</b>   | <b>469</b> |
| 12            | <b>wt</b>   | <b>469</b> |
| 13            | <b>wt</b>   | <b>469</b> |
| * 14          | <b>3083</b> | <b>469</b> |
| 15            | <b>wt</b>   | <b>469</b> |
| 16            | <b>3083</b> | <b>wt</b>  |
| 17            | <b>wt</b>   | <b>469</b> |
| 18            | <b>wt</b>   | <b>469</b> |
| 19            | <b>3083</b> | <b>wt</b>  |
| * 20          | <b>3083</b> | <b>469</b> |
| 21            | <b>wt</b>   | <b>469</b> |
| 22            | <b>3083</b> | <b>wt</b>  |
| 23            | <b>wt</b>   | <b>469</b> |
| 24            | <b>3083</b> | <b>wt</b>  |
| 25            | <b>wt</b>   | <b>469</b> |
| 26            | <b>3083</b> | <b>wt</b>  |
| 27            | <b>3083</b> | <b>wt</b>  |
| 28            | <b>wt</b>   | <b>469</b> |
| 29            | <b>3083</b> | <b>wt</b>  |
| 30            | <b>3083</b> | <b>wt</b>  |
| 31            | <b>wt</b>   | <b>469</b> |
| 32            | <b>wt</b>   | <b>469</b> |

608  
609  
610  
611  
612  
613  
614  
615  
616  
617  
618

**Figure 1-figure supplement 1.** Intragenic COs between the 3083 and the 469 point mutations in *ade6*. The *ade6* locus was sequenced in 32 Ade<sup>-</sup> Ura<sup>+</sup> His<sup>+</sup> colonies from an *ade6-3083* × *ade6-469* (ALP733 × ALP731) cross, in 2 instances (asterisks) it carried both mutations. wt (wild type), 3083, and 469 in bold indicate the status of the sequence confirmed by Sanger sequencing at the 5' and 3' ends, respectively. At the 3' end, the presence of 469 was assumed in some cases (not bold, black) based on the colony being Ade<sup>-</sup> and having a wt sequence at the 5' end.



619  
620

**Figure 1-table supplement 2.** Sequence and position (counted from the A of the start codon ATG as first position) of *ade6* point mutations (indicated in bold)

| allele           | position                                      | DNA sequence                                                                      | reference                                    |
|------------------|-----------------------------------------------|-----------------------------------------------------------------------------------|----------------------------------------------|
| <i>ade6-M216</i> | G47A                                          | ggtcaattgg <b>Acc</b> gaatgatg                                                    | (Szankasi et al. 1988)                       |
| <i>ade6-M375</i> | G133T                                         | acaaattgat <b>Tg</b> aggacgtga                                                    | (Szankasi et al. 1988)                       |
| <i>ade6-M26</i>  | G136T                                         | aattgatgga <b>Tg</b> acgtgagca                                                    | (Szankasi et al. 1988)                       |
| <i>ade6-3074</i> | G136T/G142C                                   | aattgatgga <b>Tg</b> acgt <b>Cag</b> cacattga                                     | (Steiner and Smith 2005)                     |
| <i>ade6-3083</i> | A131G/G134T/G136T/G142C<br>/G144T/A146G/A148C | aaattg <b>Gtg</b> <b>Ta</b> <b>Tg</b> acgt <b>Ca</b> <b>Tc</b> <b>Gc</b> Cttgatgc | (Steiner and Smith 2005)                     |
| <i>ade6-704</i>  | T645A                                         | ataatgtttg <b>Ac</b> atttagtat                                                    | (Park, Intine, and Maraia 2007) <sup>a</sup> |
| <i>ade6-52</i>   | G796A                                         | tttactcaac <b>Aaa</b> attgctcc                                                    | (Steiner et al. 2009) <sup>b</sup>           |
| <i>ade6-149</i>  | C1181T                                        | atcatgggtt <b>Tg</b> gattctgat                                                    | (Schär and Kohli 1993)                       |
| <i>ade6-3049</i> | C1214A                                        | aaagatgctg <b>Ac</b> gtcatttta                                                    | (Steiner and Smith 2005)                     |
| <i>ade6-51</i>   | C1267T                                        | tgtttcagct <b>Tacc</b> gcacacc                                                    | (Schär, Munz, and Kohli 1993)                |
| <i>ade6-469</i>  | C1468T                                        | tcagatgcct <b>Tg</b> agggtgtccc                                                   | (Szankasi et al. 1988)                       |

621  
622  
623  
624

<sup>a</sup>previously estimated by positional mapping to be C846A (Schär and Kohli 1993); theoretically both, T645A and C846A, create a UGA stop codon suppressible by *sup3-5* (Park, Intine, and Maraia 2007).

<sup>b</sup>previously reported as T956C (Schär, Munz, and Kohli 1993)

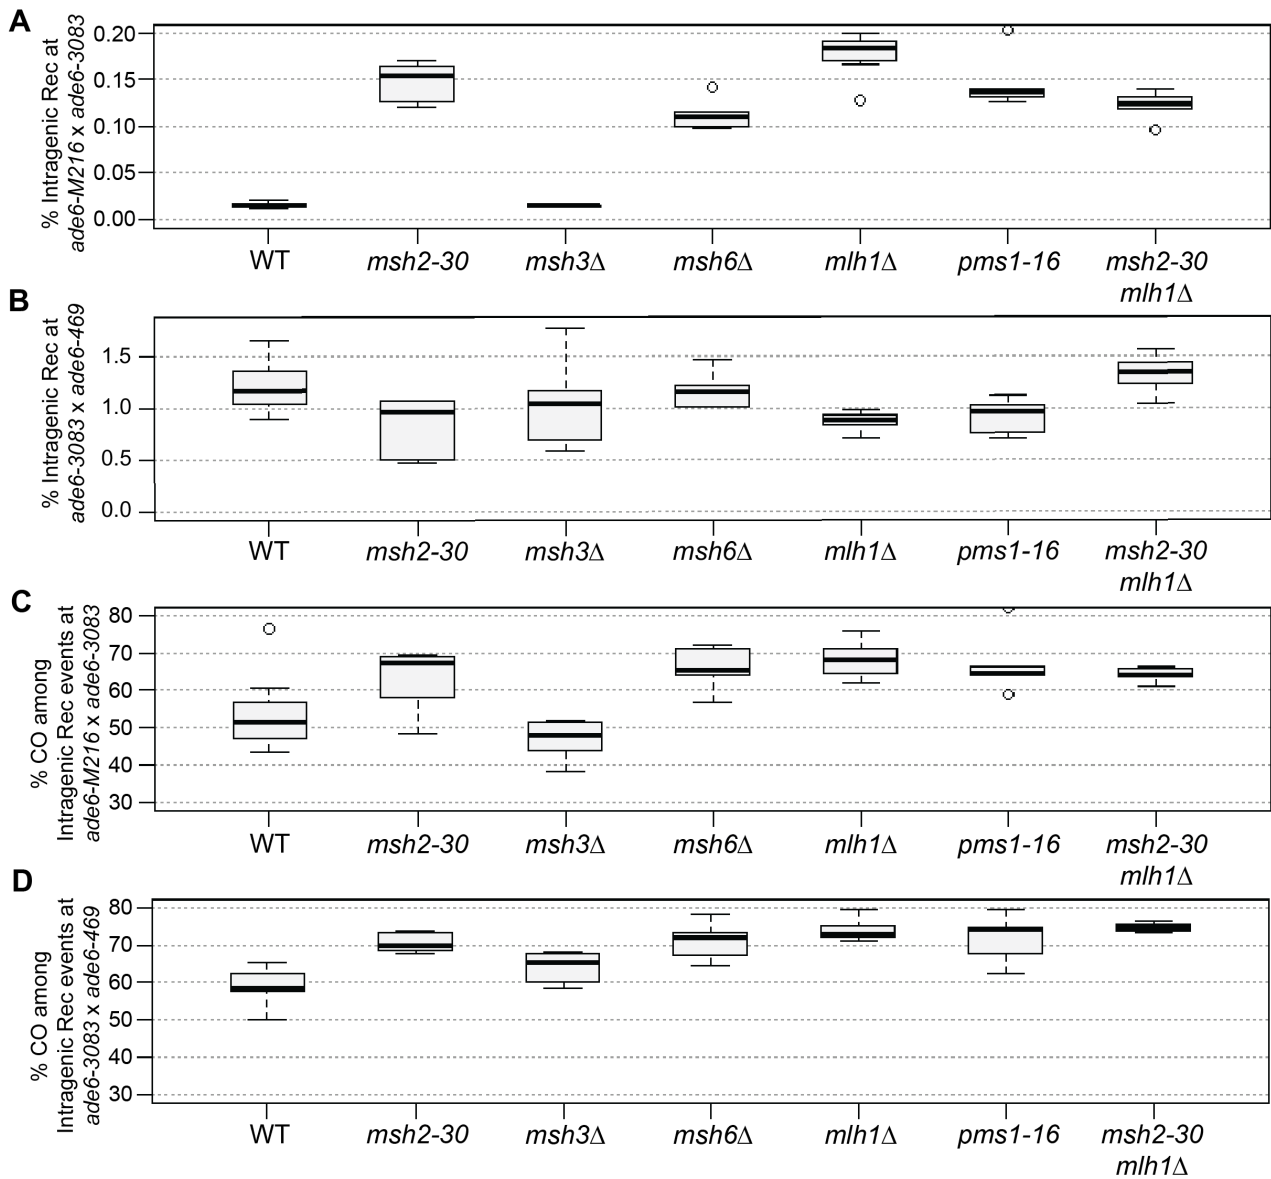

625  
626 **Figure 2.** MutS $\alpha$  and MutL $\alpha$ , but not MutS $\beta$ , are major modulators of the intragenic recombination  
627 rate and the crossover (CO) frequency among intragenic recombination events. **(A, B)** Frequency of  
628 intragenic recombination (Intragenic Rec) in wild type (WT), *msh2*, *msh3*, *msh6*, *mlh1*, and *pms1*  
629 mutants **(A)** at the intragenic 85 bp interval *ade6-M216* $\times$ *ade6-3083*: UoA110 $\times$ UoA100 (WT, n = 12),  
630 UoA478 $\times$ UoA476 (*msh2-30*, n = 6), UoA494 $\times$ UoA492 (*msh3Δ*, n = 6), UoA482 $\times$ UoA480 (*msh6Δ*, n  
631 = 6), UoA364 $\times$ UoA361 (*mlh1Δ*, n = 8), UoA407 $\times$ UoA405 (*pms1-16*, n = 5), UoA828 $\times$ UoA830 (*msh2-30*  
632 *mlh1Δ*, n = 6); **(B)** at the intragenic 1,320 bp interval *ade6-3083* $\times$ *ade6-469*: ALP733 $\times$ ALP731  
633 (WT, n = 20), UoA477 $\times$ UoA479 (*msh2-30*, n = 6), UoA493 $\times$ UoA495 (*msh3Δ*, n = 6),  
634 UoA481 $\times$ UoA483 (*msh6Δ*, n = 6), UoA362 $\times$ UoA371 (*mlh1Δ*, n = 11), UoA406 $\times$ UoA410 (*pms1-16*, n  
635 = 6), UoA827 $\times$ UoA829 (*msh2-30 mlh1Δ*, n = 6). **(C, D)** Frequency of CO between *his3*<sup>+</sup>-*aim* and  
636 *ura4*<sup>+</sup>-*aim2* associated with intragenic recombination events at *ade6* in wild type (WT), *msh2*, *msh3*,  
637 *msh6*, *mlh1*, and *pms1* mutants **(C)** at the intragenic 85 bp interval *ade6-M216* $\times$ *ade6-3083*: strains  
638 as in (A); **(D)** at the intragenic 1,320 bp interval *ade6-3083* $\times$ *ade6-469*: strains as in (B). n indicates  
639 the number of independent crosses. For details of data see Supplementary File 1-Table S2.  
640

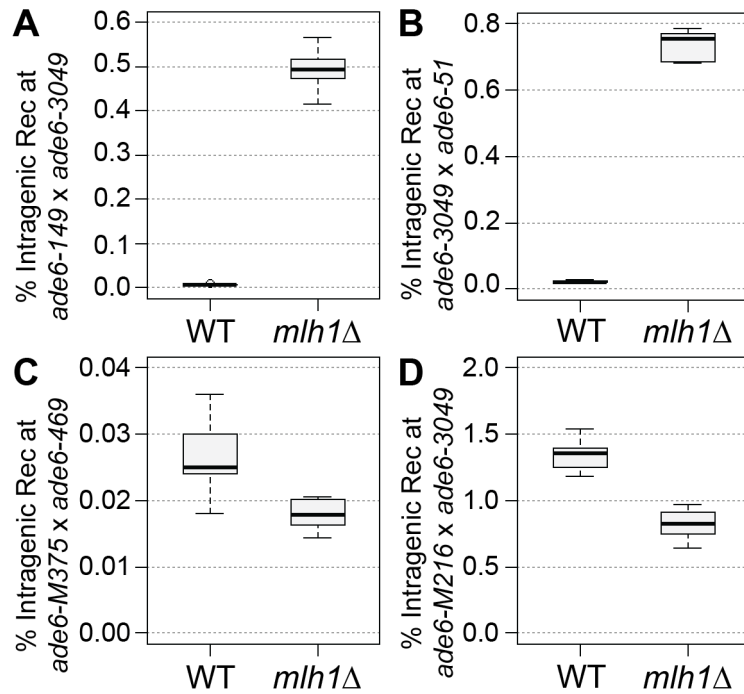

641  
642  
643  
644  
645  
646  
647  
648  
649  
650  
651  
652

**Figure 2-figure supplement 1.** MutL $\alpha$  is a major modulator of intragenic recombination (Intragenic Rec) rate. Frequency of intragenic recombination in wild type (WT), and *mlh1* $\Delta$ . **(A)** at the intragenic 33 bp interval *ade6-149* $\times$ *ade6-3049*: UoA122 $\times$ UoA497 (WT, n = 6), UoA368 $\times$ UoA512 (*mlh1* $\Delta$ , n = 6); **(B)** at the intragenic 53 bp interval *ade6-3049* $\times$ *ade6-51*: UoA120 $\times$ UoA463 (WT, n = 6), UoA366 $\times$ UoA511 (*mlh1* $\Delta$ , n = 6); **(C)** at the intragenic 1,335 bp interval *ade6-M375* $\times$ *ade6-469*: ALP1541 $\times$ ALP731 (WT, n = 16), UoA510 $\times$ UoA371 (*mlh1* $\Delta$ , n = 6); **(D)** at the intragenic 1,168 bp interval *ade6-M216* $\times$ *ade6-3049*: UoA99 $\times$ UoA123 (WT, n = 12), UoA368 $\times$ UoA361 (*mlh1* $\Delta$ , n = 12); n indicates the number of independent crosses. For details of data see Supplementary File 1-Table S2.

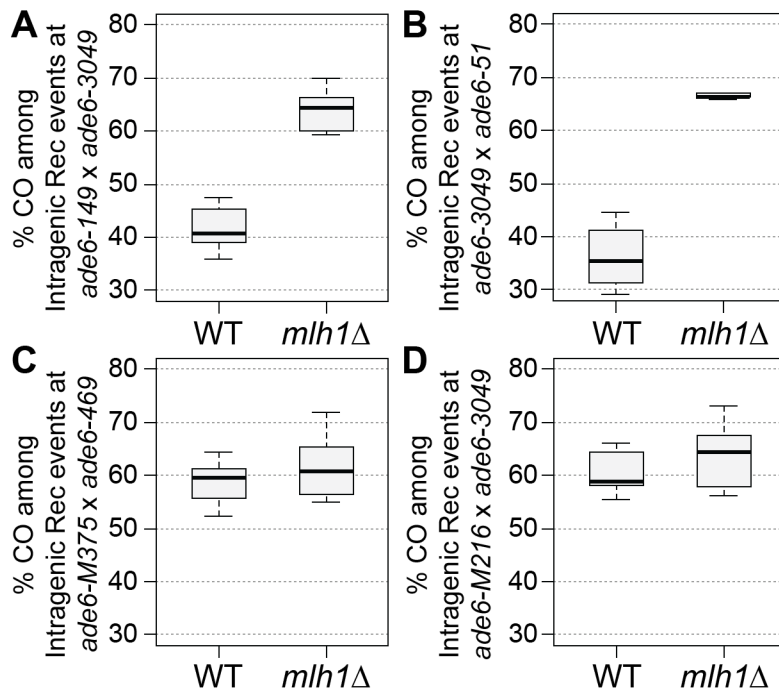

653  
654  
655  
656

**Figure 2-figure supplement 2.** MutL $\alpha$  is a major modulator of crossover (CO) frequency among intragenic recombination (Intragenic Rec) events. Frequency of CO between *his3*<sup>+</sup>-*aim* and *ura4*<sup>+</sup>-*aim2* associated with intragenic recombination events at *ade6* in wild type (WT), and *mlh1* $\Delta$ . **(A)** at

657 the intragenic 33 bp interval *ade6-149*×*ade6-3049*: UoA122×UoA497 (WT, n = 6), UoA368×UoA512  
 658 (*mlh1*Δ, n = 6); **(B)** at the intragenic 53 bp interval *ade6-3049*×*ade6-51*: UoA120×UoA463 (WT, n =  
 659 6), UoA366×UoA511 (*mlh1*Δ, n = 6); **(C)** at the intragenic 1,335 bp interval *ade6-M375*×*ade6-469*:  
 660 ALP1541×ALP731 (WT, n = 16), UoA510×UoA371 (*mlh1*Δ, n = 6); **(D)** at the intragenic 1,168 bp  
 661 interval *ade6-M216*×*ade6-3049*: UoA99×UoA123 (WT, n = 12), UoA368×UoA361 (*mlh1*Δ, n = 12);  
 662 n indicates the number of independent crosses. For details of data see Supplementary File 1-Table  
 663 S2.  
 664

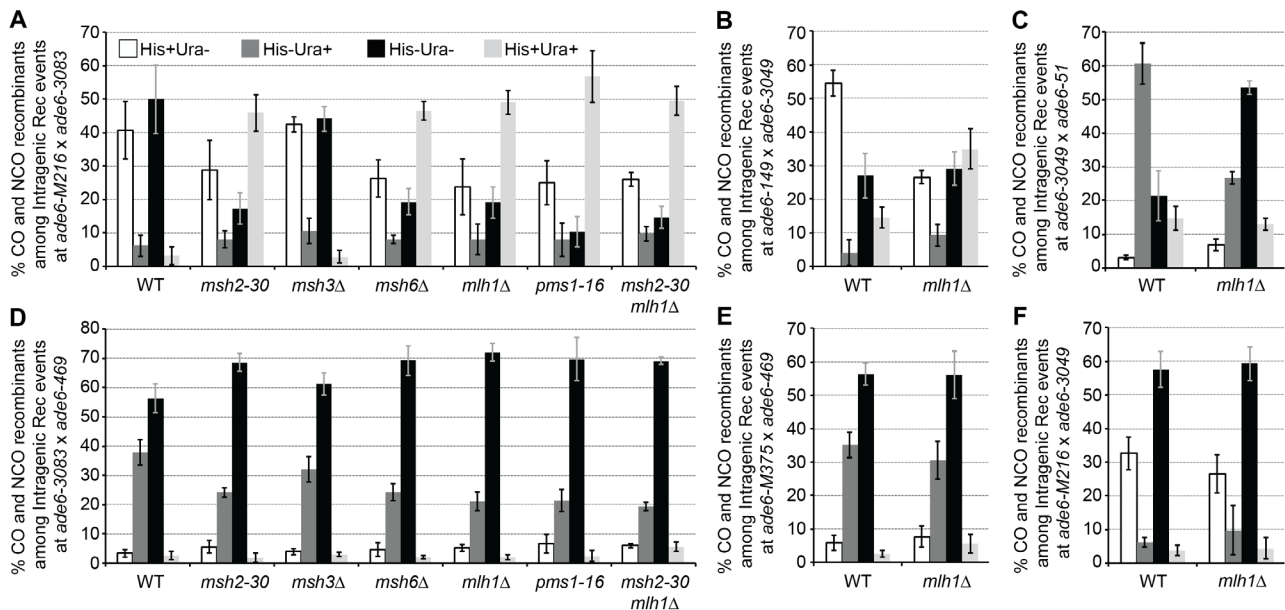

665 **Figure 2-figure supplement 3.** Distribution of non-crossover (NCO) and crossover (CO) classes  
 666 among intragenic recombination (Intragenic Rec) events at *ade6* in wild type (WT), *msh2*, *msh3*,  
 667 *msh6*, *mlh1*, and *pms1* mutants. **(A)** at the intragenic 85 bp interval *ade6-M216*×*ade6-3083*:  
 669 UoA110×UoA100 (WT, n = 12), UoA478×UoA476 (*msh2-30*, n = 6), UoA494×UoA492 (*msh3*Δ, n =  
 670 6), UoA482×UoA480 (*msh6*Δ, n = 6), UoA364×UoA361 (*mlh1*Δ, n = 8), UoA407×UoA405 (*pms1-16*,  
 671 n = 5), UoA828×UoA830 (*msh2-30 mlh1*Δ, n = 6); **(B)** at the intragenic 33 bp interval *ade6-149*×*ade6-*  
 672 *3049*: UoA122×UoA497 (WT, n = 6), UoA368×UoA512 (*mlh1*Δ, n = 6); **(C)** at the intragenic 53 bp  
 673 interval *ade6-3049*×*ade6-51*: UoA120×UoA463 (WT, n = 6), UoA366×UoA511 (*mlh1*Δ, n = 6); **(D)** at  
 674 the intragenic 1,320 bp interval *ade6-3083*×*ade6-469*: ALP733×ALP731 (WT, n = 20),  
 675 UoA477×UoA479 (*msh2-30*, n = 6), UoA493×UoA495 (*msh3*Δ, n = 6), UoA481×UoA483 (*msh6*Δ, n  
 676 = 6), UoA362×UoA371 (*mlh1*Δ, n = 11), UoA406×UoA410 (*pms1-16*, n = 6), UoA827×UoA829  
 677 (*msh2-30 mlh1*Δ, n = 6); **(E)** at the intragenic 1,335 bp interval *ade6-M375*×*ade6-469*:  
 678 ALP1541×ALP731 (WT, n = 16), UoA510×UoA371 (*mlh1*Δ, n = 6); **(F)** at the intragenic 1,168 bp  
 679 interval *ade6-M216*×*ade6-3049*: UoA99×UoA123 (WT, n = 12), UoA368×UoA361 (*mlh1*Δ, n = 12);  
 680 n indicates the number of independent crosses. For details of data see Supplementary File 1-Table  
 681 S2.  
 682  
 683



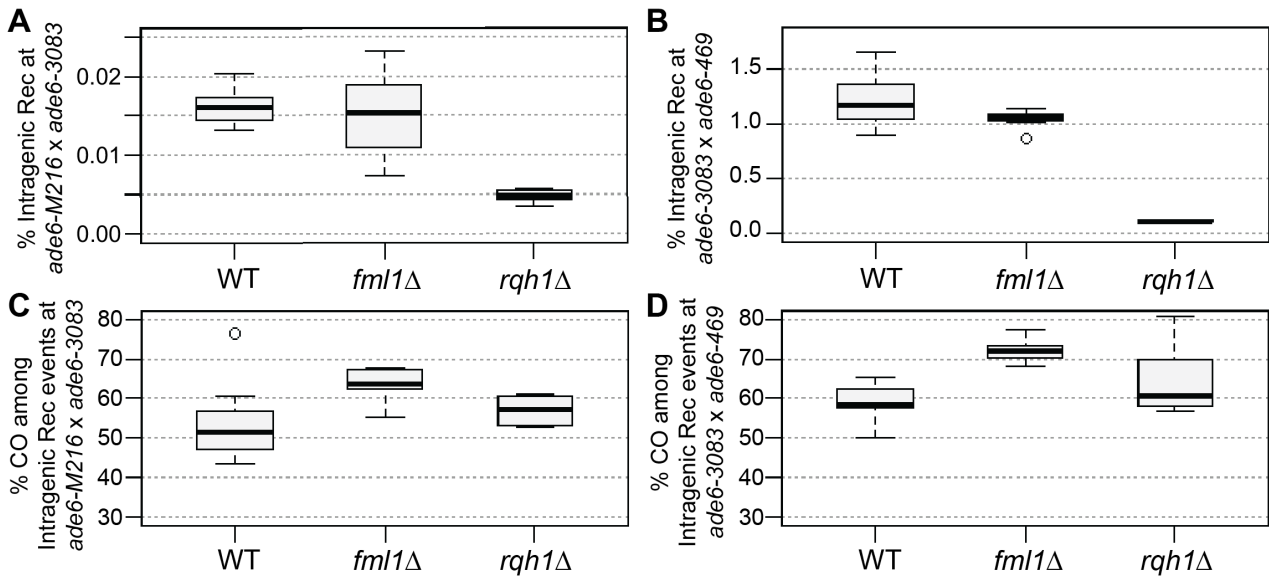

684  
685 **Figure 3.** The RecQ-family helicase Rqh1, but not the FANCM-type helicase Fml1, is a major  
686 modulator of the intragenic recombination rate. Rqh1 and Fml1 are major modulators of crossover  
687 (CO) frequency among intragenic recombination events. Frequency of intragenic recombination  
688 (Intrinsic Rec) in WT, *fml1*, and *rqh1* deletions **(A)** at the intragenic 85 bp interval *ade6-*  
689 *M216xade6-3083*: UoA110xUoA100 (WT, n = 12), UoA450xUoA447 (*fml1Δ*, n = 9),  
690 UoA502xUoA499 (*rqh1Δ*, n = 6); **(B)** at the intragenic 1,320 bp interval *ade6-3083xade6-469*:  
691 ALP733xALP731 (WT, n = 20), ALP1133xMCW4718 (*fml1Δ*, n = 15), ALP781xALP780 (*rqh1Δ*, n =  
692 10). Frequency of CO between *his3<sup>+</sup>-aim* and *ura4<sup>+</sup>-aim2* associated with intragenic recombination  
693 events at *ade6* in WT, *fml1*, and *rqh1* deletions **(C)** at the intragenic 85 bp interval *ade6-*  
694 *M216xade6-3083*: strains as in (A); **(D)** at the intragenic 1,320 bp interval *ade6-3083xade6-469*:  
695 strains as in (B). n indicates the number of independent crosses. For details of data see Supplementary File 1-Table  
696 S2.  
697

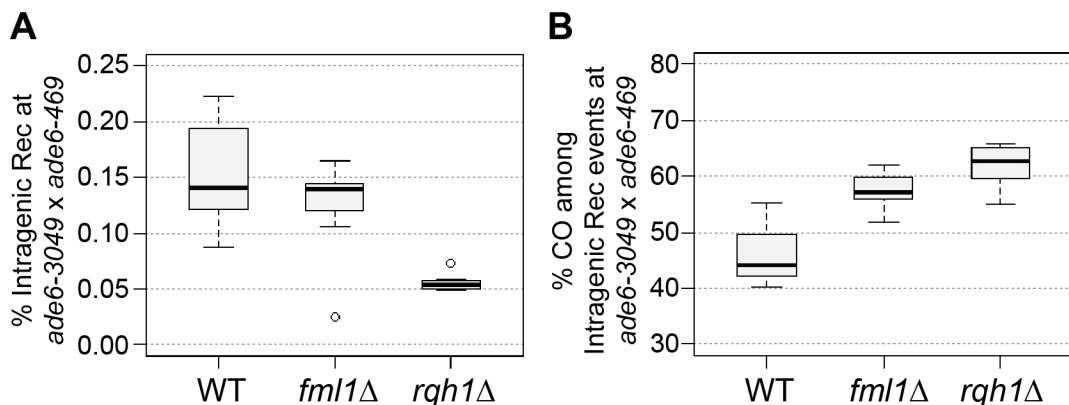

698  
699 **Figure 3-figure supplement 1.** Rqh1 and Fml1 modulating meiotic recombination outcome at the  
700 intragenic 254 bp interval *ade6-3049xade6-469*: **(A)** Frequency of intragenic recombination  
701 (Intrinsic Rec) in wild type (WT), *fml1*, and *rqh1* mutants, UoA120xALP731 (WT, n = 31),  
702 ALP1716xMCW4718 (*fml1Δ*, n = 11), MCW6587xALP780 (*rqh1Δ*, n = 10); **(B)** Frequency of  
703 crossovers (CO) among intragenic recombination events at *ade6* in wild type (WT), *fml1*, and  
704 *rqh1* mutants, crosses as in (A). n indicates the number of independent crosses. For details of data see  
705 Supplementary File 1-Table S2.  
706  
707

708

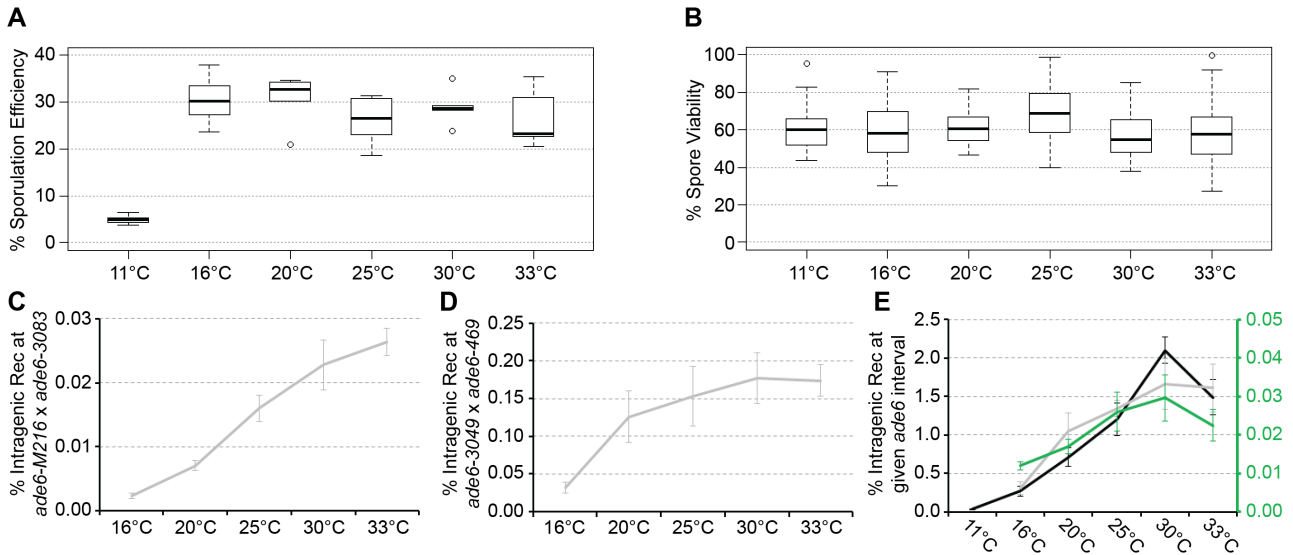

709

710

711

712

713

714

715

716

717

718

719

720

721

722

723

724

725

726

**Figure 4.** Environmental temperature alters intragenic recombination frequency at *ade6*. **(A)** Sporulation efficiency in % determined in crosses of ALP714×ALP688 at 11°C after 14d (n = 7), at 16°C after 7d (n = 6), at 20°C after 5d (n = 5), at 25°C after 3d (n = 6), at 30°C after 2d (n = 6), and at 33°C after 2d (n = 6). **(B)** Cumulative spore viability in % encompassing all data in (C – E) at 11°C after 14d (n = 11), at 16°C after 7d (n = 64), at 20°C after 5d (n = 46), at 25°C after 3d (n = 75), at 30°C after 2d (n = 48), and at 33°C after 2d (n = 59). **(C – E)** Frequency of intragenic recombination (Intragenic Rec) in wild type at the indicated intragenic *ade6* interval **(C)** UoA110×UoA100: 16°C (n = 15), 20°C (n = 10), 25°C (n = 12), 30°C (n = 12), 33°C (n = 12); **(D)** UoA120×ALP731: 16°C (n = 8), 20°C (n = 8), 25°C (n = 31), 30°C (n = 8), 33°C (n = 8); **(E)** UoA99×UoA123 (*ade6-M216*×*ade6-3049*, grey line): 16°C (n = 18), 20°C (n = 12), 25°C (n = 12), 30°C (n = 17), 33°C (n = 17); ALP733×ALP731 (*ade6-3083*×*ade6-469*, black line): 11°C (n = 11), 16°C (n = 12), 20°C (n = 14), 25°C (n = 20), 30°C (n = 12), 33°C (n = 11); ALP1541×ALP731 (*ade6-M375*×*ade6-469*, green line to be read from green secondary y-axis): 16°C (n = 12), 20°C (n = 12), 25°C (n = 16), 30°C (n = 12), 33°C (n = 11). n indicates the number of independent crosses. For details of data see Supplementary File 1-Table S3 (A) and Supplementary File 1-Table S4 (B – E).

727

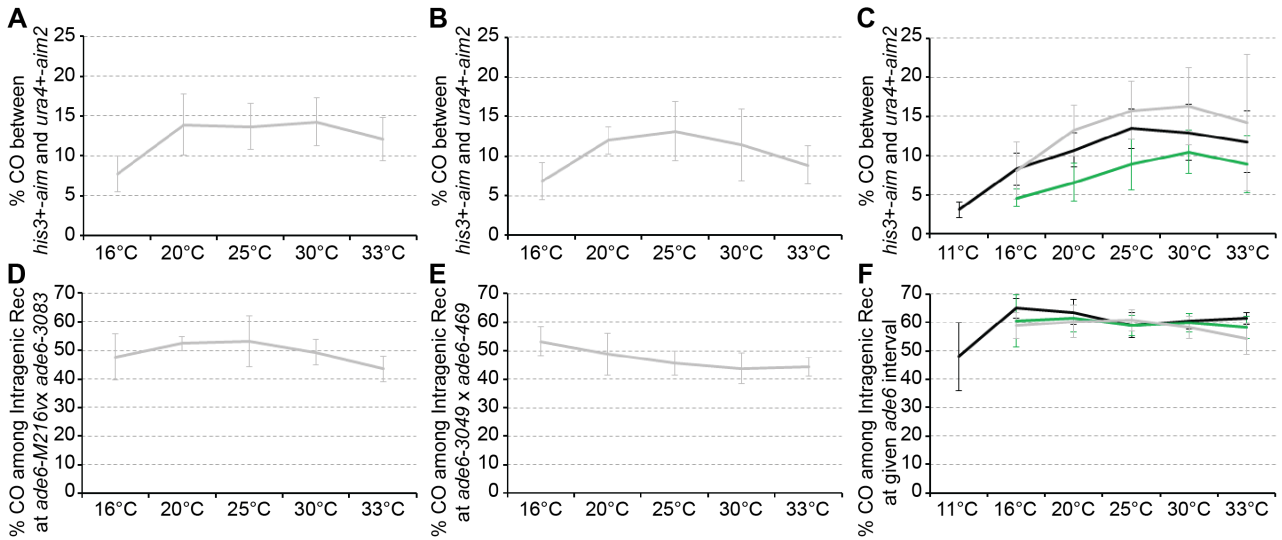

728

729

730

731

732

733

734

735

736

737

738

739

**Figure 4-figure supplement 1.** Frequency of **(A – C)** crossover (CO) between *his3<sup>+</sup>-aim* and *ura4<sup>+</sup>-aim2*, and **(D – F)** CO between *his3<sup>+</sup>-aim* and *ura4<sup>+</sup>-aim2* among intragenic recombination (Intragenic Rec) events at *ade6* from crosses performed at different temperatures. **(A, D)** UoA110×UoA100: 16°C (n = 15), 20°C (n = 10), 25°C (n = 12), 30°C (n = 12), 33°C (n = 12); **(B, E)** UoA120×ALP731: 16°C (n = 8), 20°C (n = 8), 25°C (n = 31), 30°C (n = 8), 33°C (n = 8); **(C, F)** UoA99×UoA123 (*ade6-M216*×*ade6-3049*, grey line): 16°C (n = 18), 20°C (n = 12), 25°C (n = 12), 30°C (n = 17), 33°C (n = 17); ALP733×ALP731 (*ade6-3083*×*ade6-469*, black line): 11°C (n = 11), 16°C (n = 12), 20°C (n = 14), 25°C (n = 20), 30°C (n = 12), 33°C (n = 11); ALP1541×ALP731 (*ade6-M375*×*ade6-469*, green line): 16°C (n = 12), 20°C (n = 12), 25°C (n = 16), 30°C (n = 12), 33°C (n = 11). n indicates the number of independent crosses. For details of data see Supplementary File 1-Table S4.

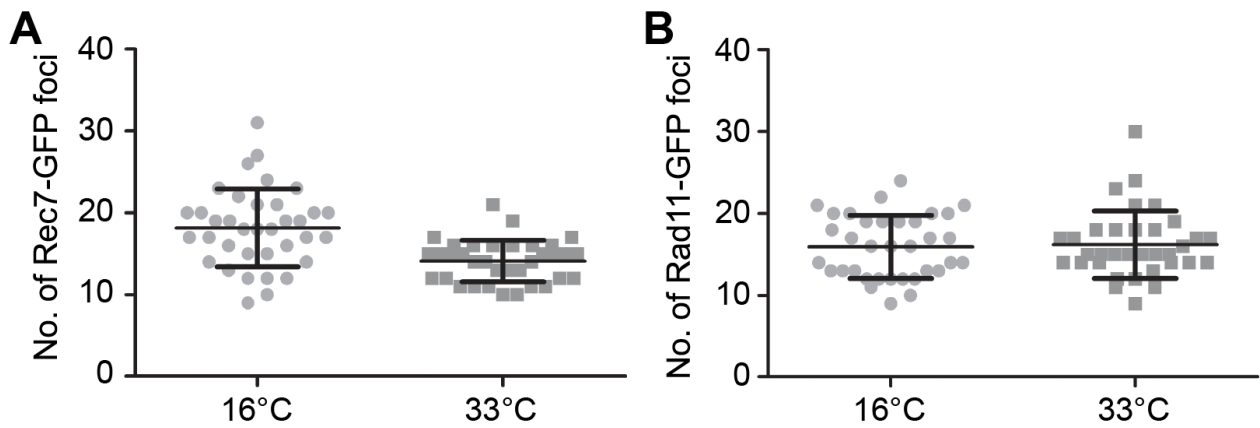

740  
741  
742  
743  
744  
745  
746  
747  
748  
749  
750  
751

**Figure 5.** DSB formation does not seem to be affected by temperature. **(A, B)** Focus counts of immune-detected Rec7-GFP and Rad11-GFP on Hop1-positive nuclear spreads from meiotic, azygotic timecourses at timepoints with maximum horsetail (meiotic prophase I) nucleus frequency; black horizontal lines indicate mean values, error bars represent standard deviation. **(A)** Number of Rec7-GFP foci per nucleus at 16°C (25hrs timepoint, n = 36) and 33°C (5hrs timepoint, n = 35) from meiotic timecourses of UoA825. **(B)** Number of Rad11-GFP foci per nucleus at 16°C (25hrs timepoint, n = 35) and 33°C (5hrs timepoint, n = 35) from meiotic timecourses of UoA826. For details of data see Supplementary File 1-Table S5.

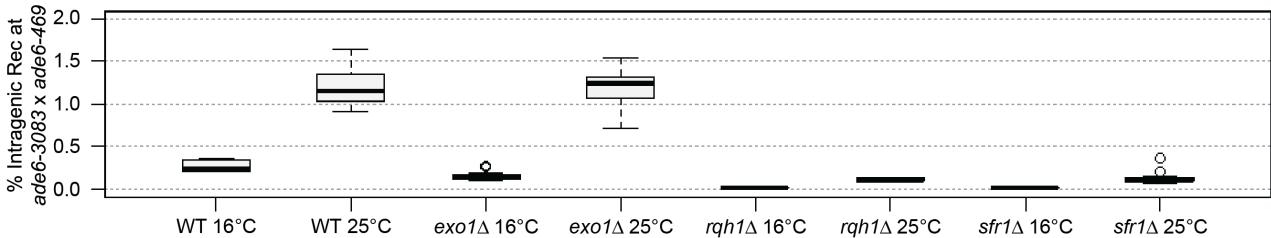

752  
753  
754  
755  
756  
757  
758  
759  
760

**Figure 6.** Cold temperature causes stronger reductions in intragenic recombination (Intragenic Rec) frequency in *exo1*, *rqh1*, or *sfr1* deletions than in wild type. Frequency of intragenic recombination (Intragenic Rec) at *ade6-3083 x ade6-469* at 16°C and 25°C in wild type (WT), *exo1Δ*, *rqh1Δ*, and *sfr1Δ*. ALP733×ALP731 (WT; 16°C n = 12, 25°C n = 20), MCW4269×MCW4268 (*exo1Δ*; 16°C n = 11, 25°C n = 11), ALP781×ALP780 (*rqh1Δ*; 16°C n = 12, 25°C n = 10), ALP800×ALP782 (*sfr1Δ*; 16°C n = 11, 25°C n = 10). n indicates the number of independent crosses. For details of data see Supplementary File 1-Table S4.

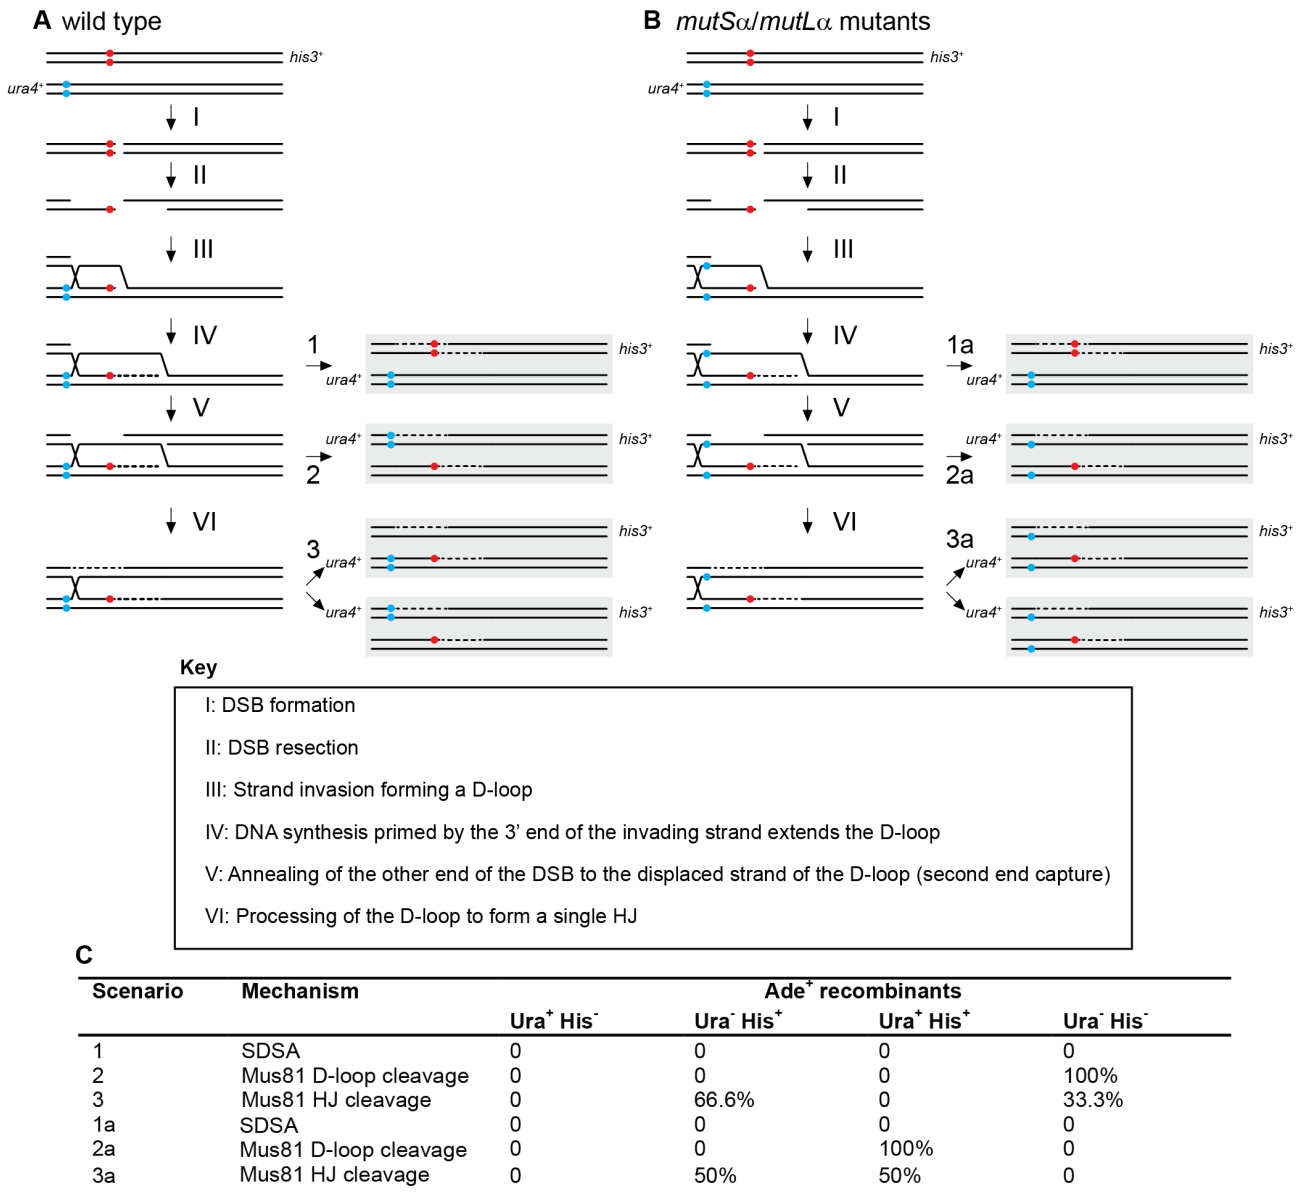

761  
762  
763  
764  
765  
766  
767  
768  
769  
770  
771  
772  
773  
774  
775  
776

**Figure 7.** Possible scenarios for CO/NCO recombination events creating Ade<sup>+</sup> progeny from crosses with different *ade6* heteroalleles and *ura4<sup>+</sup>-aim2* and *his3<sup>+</sup>-aim* as flanking markers. **(A, B)** The two black lines represent double-stranded DNA of one chromatid; chromatids not involved in the depicted recombination event are omitted for clarity. Positions of the hotspot and non-hotspot alleles are indicated in red and light blue, respectively. **(A)** Predominant situation in wild type, where Ade<sup>+</sup> CO recombinants are mostly Ura<sup>-</sup> His<sup>-</sup>. **(B)** Situation explaining the Ade<sup>+</sup> Ura<sup>+</sup> His<sup>+</sup> progeny observed in some *mutS $\alpha$ -mutL $\alpha$*  mutant crosses. Extensive branch migration and/or multiple invasion events could cause the D-loop or Holliday Junction (HJ) eventually being established upstream of the non-hotspot allele. Subsequent processing will generate Ade<sup>+</sup> Ura<sup>+</sup> His<sup>+</sup> CO progeny at a high frequency. **(C)** Frequency of possible recombination outcomes in crosses involving two *ade6* heteroalleles and flanking markers (*ura4<sup>+</sup>-aim2* and *his3<sup>+</sup>-aim*) as shown in (A) and (B).



777 **References**

778

- 779 Bähler, Jürg, Jian Qiu Wu, Mark S. Longtine, Nirav G. Shah, Amos McKenzie, Alexander B.  
780 Steever, Achim Wach, Peter Philippsen, and John R. Pringle. 1998. "Heterologous Modules  
781 for Efficient and Versatile PCR-Based Gene Targeting in *Schizosaccharomyces Pombe*."  
782 *Yeast* 14 (10): 943–51. doi:10.1002/(SICI)1097-0061(199807)14:10<943::AID-  
783 YEA292>3.0.CO;2-Y.
- 784 Bomblies, Kirsten, James D. Higgins, and Levi Yant. 2015. "Meiosis Evolves: Adaptation to  
785 External and Internal Environments." *New Phytologist* 208 (2): 306–23.  
786 doi:10.1111/nph.13499.
- 787 Börner, G Valentin, Nancy Kleckner, and Neil Hunter. 2004. "Crossover/Noncrossover  
788 Differentiation, Synaptonemal Complex Formation, and Regulatory Surveillance at the  
789 Leptotene/Zygotene Transition of Meiosis." *Cell* 117 (1): 29–45.  
790 <http://www.ncbi.nlm.nih.gov/pubmed/15066280>.
- 791 Brown, Simon D, and Alexander Lorenz. 2016. "Single-Step Marker Switching in  
792 *Schizosaccharomyces Pombe* Using a Lithium Acetate Transformation Protocol." *Bio-Protocol*  
793 6 (24): e2075. doi:10.21769/BioProtoc.2075.
- 794 Brown, Simon David, Olga Dorota Jarosinska, and Alexander Lorenz. 2018. "Genetic Interactions  
795 between the Chromosome Axis-Associated Protein Hop1 and Homologous Recombination  
796 Determinants in *Schizosaccharomyces Pombe*." *Current Genetics* 64 (5): 1089–1104.  
797 doi:10.1007/s00294-018-0827-7.
- 798 Cooper, Tim J, Margaret R Crawford, Laura J Hunt, Marie-Claude Marsolier-Kergoat, Bertrand  
799 Llorente, and Matthew J Neale. 2018. "Mismatch Repair Impedes Meiotic Crossover  
800 Interference." *BioRxiv*, 480418. doi:10.1101/480418.
- 801 Crismani, Wayne, Chloé Girard, Nicole Froger, Mónica Pradillo, Juan Luis Santos, Liudmila  
802 Chelysheva, Gregory P. Copenhaver, Christine Horlow, and Raphaël Mercier. 2012. "FANCM  
803 Limits Meiotic Crossovers." *Science* 336 (6088): 1588–90. doi:10.1126/science.1220381.
- 804 Cromie, Gareth A, Randy W Hyppa, and Gerald R Smith. 2008. "The Fission Yeast BLM Homolog  
805 Rqh1 Promotes Meiotic Recombination." *Genetics* 179 (3): 1157–67.  
806 doi:10.1534/genetics.108.088955.
- 807 Cromie, Gareth A, Randy W Hyppa, Andrew F Taylor, Kseniya Zakharyevich, Neil Hunter, and  
808 Gerald R Smith. 2006. "Single Holliday Junctions Are Intermediates of Meiotic  
809 Recombination." *Cell* 127 (6): 1167–78. doi:10.1016/j.cell.2006.09.050.
- 810 Doe, Claudette L, Jong Sook Ahn, Julie Dixon, and Matthew C Whitby. 2002. "Mus81-Eme1 and  
811 Rqh1 Involvement in Processing Stalled and Collapsed Replication Forks." *The Journal of  
812 Biological Chemistry* 277 (36): 32753–59. doi:10.1074/jbc.M202120200.
- 813 Duroc, Yann, Rajeev Kumar, Lepakshi Ranjha, Céline Adam, Raphaël Guérois, Khan Md Muntaz,  
814 Marie-Claude Marsolier-Kergoat, et al. 2017. "Concerted Action of the MutLβ Heterodimer and  
815 Mer3 Helicase Regulates the Global Extent of Meiotic Gene Conversion." *ELife* 6: e21900.  
816 doi:10.7554/eLife.21900.
- 817 Farah, Joseph A, Gareth A Cromie, and Gerald R Smith. 2009. "Ctp1 and Exonuclease 1,  
818 Alternative Nucleases Regulated by the MRN Complex, Are Required for Efficient Meiotic  
819 Recombination." *Proceedings of the National Academy of Sciences of the United States of  
820 America* 106 (23): 9356–61. doi:10.1073/pnas.0902793106.
- 821 Flor-Parra, Ignacio, Jacob Zhurinsky, Manuel Bernal, Paola Gallardo, and Rafael R Daga. 2014. "A  
822 Lallzyme MMX-Based Rapid Method for Fission Yeast Protoplast Preparation." *Yeast  
823 (Chichester, England)* 31 (2): 61–66. doi:10.1002/yea.2994.
- 824 Fox, M E, J B Virgin, J Metzger, and G R Smith. 1997. "Position- and Orientation-Independent  
825 Activity of the *Schizosaccharomyces Pombe* Meiotic Recombination Hot Spot M26."  
826 *Proceedings of the National Academy of Sciences of the United States of America* 94 (14):  
827 7446–51. doi:10.1073/pnas.94.14.7446.

- 828 Goldstein, A L, and J H McCusker. 1999. "Three New Dominant Drug Resistance Cassettes for  
829 Gene Disruption in *Saccharomyces Cerevisiae*." *Yeast* 15 (14): 1541–53.  
830 doi:10.1002/(SICI)1097-0061(199910)15:14<1541::AID-YEA476>3.0.CO;2-K.
- 831 Gutz, Herbert. 1971. "Site Specific Induction of Gene Conversion in *Schizosaccharomyces*  
832 *Pombe*." *Genetics* 69 (3): 317–37. <https://www.ncbi.nlm.nih.gov/pubmed/17248549>.
- 833 Haruta, Nami, Yumiko Kurokawa, Yasuto Murayama, Yufuko Akamatsu, Satoru Unzai, Yasuhiro  
834 Tsutsui, and Hiroshi Iwasaki. 2006. "The Swi5-Sfr1 Complex Stimulates Rhp51/Rad51- and  
835 Dmc1-Mediated DNA Strand Exchange *in Vitro*." *Nature Structural & Molecular Biology* 13 (9):  
836 823–30. doi:10.1038/nsmb1136.
- 837 Hatkevich, Talia, Kathryn P. Kohl, Susan McMahan, Michaelyn A. Hartmann, Andrew M. Williams,  
838 and Jeff Sekelsky. 2017. "Bloom Syndrome Helicase Promotes Meiotic Crossover Patterning  
839 and Homolog Disjunction." *Current Biology* 27 (1). Elsevier Ltd.: 96–102.  
840 doi:10.1016/j.cub.2016.10.055.
- 841 Higgins, James D., Ruth M. Perry, Abdellah Barakate, Luke Ramsay, Robbie Waugh, Claire  
842 Halpin, Susan J. Armstrong, and F. Chris H. Franklin. 2012. "Spatiotemporal Asymmetry of  
843 the Meiotic Program Underlies the Predominantly Distal Distribution of Meiotic Crossovers in  
844 Barley." *The Plant Cell* 24 (10): 4096–4109. doi:10.1105/tpc.112.102483.
- 845 Holliday, Robin. 2007. "A Mechanism for Gene Conversion in Fungi." *Genetical Research* 5 (5–6):  
846 282–304. doi:10.1017/S0016672308009476.
- 847 Hong, Soogil, Youngjin Sung, Mi Yu, Minsu Lee, Nancy Kleckner, and Keun P. Kim. 2013. "The  
848 Logic and Mechanism of Homologous Recombination Partner Choice." *Molecular Cell* 51 (4):  
849 440–53. doi:10.1016/j.molcel.2013.08.008.
- 850 Humphries, Neil, and Andreas Hochwagen. 2014. "A Non-Sister Act: Recombination Template  
851 Choice during Meiosis." *Experimental Cell Research* 329 (1). Elsevier: 53–60.  
852 doi:10.1016/j.yexcr.2014.08.024.
- 853 Hunter, Neil. 2015. "Meiotic Recombination: The Essence of Heredity." *Cold Spring Harbor*  
854 *Perspectives in Biology* 7 (12): a016618. doi:10.1101/cshperspect.a016618.
- 855 Hyppa, Randy W., Kyle R. Fowler, Lubos Cipak, Juraj Gregan, and Gerald R. Smith. 2014. "DNA  
856 Intermediates of Meiotic Recombination in Synchronous *S. Pombe* at Optimal Temperature."  
857 *Nucleic Acids Research* 42 (1): 359–69. doi:10.1093/nar/gkt861.
- 858 Hyppa, Randy W, and Gerald R Smith. 2010. "Crossover Invariance Determined by Partner Choice  
859 for Meiotic DNA Break Repair." *Cell* 142 (2): 243–55. doi:10.1016/j.cell.2010.05.041.
- 860 Jeffares, Daniel C. 2018. "The Natural Diversity and Ecology of Fission Yeast." *Yeast* 35 (3): 253–  
861 60. doi:10.1002/yea.3293.
- 862 Kan, Fengling, Mari K Davidson, and Wayne P Wahls. 2011. "Meiotic Recombination Protein  
863 Rec12: Functional Conservation, Crossover Homeostasis and Early Crossover/Non-  
864 Crossover Decision." *Nucleic Acids Research* 39 (4): 1460–72. doi:10.1093/nar/gkq993.
- 865 Kon, N, M D Krawchuk, B G Warren, G R Smith, and W P Wahls. 1997. "Transcription Factor  
866 Mts1/Mts2 (Atf1/Pcr1, Gad7/Pcr1) Activates the M26 Meiotic Recombination Hotspot in  
867 *Schizosaccharomyces Pombe*." *Proceedings of the National Academy of Sciences of the*  
868 *United States of America* 94 (25): 13765–70. <http://www.ncbi.nlm.nih.gov/pubmed/9391101>.
- 869 Lam, Isabel, and Scott Keeney. 2015. "Mechanism and Regulation of Meiotic Recombination  
870 Initiation." *Cold Spring Harbor Perspectives in Biology* 7 (1): a016634.  
871 doi:10.1101/cshperspect.a016634.
- 872 Langerak, Petra, Eva Mejia-Ramirez, Oliver Limbo, and Paul Russell. 2011. "Release of Ku and  
873 MRN from DNA Ends by Mre11 Nuclease Activity and Ctp1 Is Required for Homologous  
874 Recombination Repair of Double-Strand Breaks." *PLoS Genetics* 7 (9): e1002271.  
875 doi:10.1371/journal.pgen.1002271.
- 876 Liti, Gianni. 2015. "The Fascinating and Secret Wild Life of the Budding Yeast *S. Cerevisiae*." *ELife*  
877 4: e05835. doi:10.7554/eLife.05835.

- 878 Lloyd, Andrew, Chris Morgan, Chris Franklin, and Kirsten Bomblies. 2018. "Plasticity of Meiotic  
879 Recombination Rates in Response to Temperature in *Arabidopsis*." *Genetics* 208 (4): 1409–  
880 20. doi:10.1534/genetics.117.300588.
- 881 Loidl, Josef, and Alexander Lorenz. 2009. "Analysis of *Schizosaccharomyces Pombe* Meiosis by  
882 Nuclear Spreading." *Methods in Molecular Biology*, Methods in Molecular Biology, 558  
883 (January). Totowa, NJ: Humana Press: 15–36. doi:10.1007/978-1-60761-103-5\_2.
- 884 Lorenz, Alexander. 2015. "New Cassettes for Single-Step Drug Resistance and Prototrophic  
885 Marker Switching in Fission Yeast." *Yeast* 32 (12): 703–10. doi:10.1002/yea.3097.
- 886 ———. 2017. "Modulation of Meiotic Homologous Recombination by DNA Helicases." *Yeast* 34  
887 (5): 195–203. doi:10.1002/yea.3227.
- 888 Lorenz, Alexander, Anna Estreicher, Jürg Kohli, and Josef Loidl. 2006. "Meiotic Recombination  
889 Proteins Localize to Linear Elements in *Schizosaccharomyces Pombe*." *Chromosoma* 115 (4):  
890 330–40. doi:10.1007/s00412-006-0053-9.
- 891 Lorenz, Alexander, Alizée Mehats, Fekret Osman, and Matthew C Whitby. 2014. "Rad51/Dmc1  
892 Paralogs and Mediators Oppose DNA Helicases to Limit Hybrid DNA Formation and Promote  
893 Crossovers during Meiotic Recombination." *Nucleic Acids Research* 42 (22): 13723–35.  
894 doi:10.1093/nar/gku1219.
- 895 Lorenz, Alexander, Fekret Osman, Weili Sun, Saikat Nandi, Roland Steinacher, and Matthew C  
896 Whitby. 2012. "The Fission Yeast FANCM Ortholog Directs Non-Crossover Recombination  
897 during Meiosis." *Science (New York, N.Y.)* 336 (6088): 1585–88.  
898 doi:10.1126/science.1220111.
- 899 Lorenz, Alexander, Jennifer L Wells, David W Pryce, Maria Novatchkova, Frank Eisenhaber,  
900 Ramsay J McFarlane, and Josef Loidl. 2004. "*S. Pombe* Meiotic Linear Elements Contain  
901 Proteins Related to Synaptonemal Complex Components." *Journal of Cell Science* 117 (Pt  
902 15): 3343–51. doi:10.1242/jcs.01203.
- 903 Lorenz, Alexander, Stephen C West, and Matthew C Whitby. 2010. "The Human Holliday Junction  
904 Resolvase GEN1 Rescues the Meiotic Phenotype of a *Schizosaccharomyces Pombe Mus81*  
905 Mutant." *Nucleic Acids Research* 38 (6): 1866–73. doi:10.1093/nar/gkp1179.
- 906 Lukaszewicz, Agnieszka, Rachel A Howard-Till, and Josef Loidl. 2013. "Mus81 Nuclease and Sgs1  
907 Helicase Are Essential for Meiotic Recombination in a Protist Lacking a Synaptonemal  
908 Complex." *Nucleic Acids Research* 41 (20): 9296–9309. doi:10.1093/nar/gkt703.
- 909 Manhart, Carol M., and Eric Alani. 2016. "Roles for Mismatch Repair Family Proteins in Promoting  
910 Meiotic Crossing Over." *DNA Repair* 38 (February). Elsevier B.V.: 84–93.  
911 doi:10.1016/j.dnarep.2015.11.024.
- 912 Marsolier-Kergoat, Marie Claude, Md Muntaz Khan, Jonathan Schott, Xuan Zhu, and Bertrand  
913 Llorente. 2018. "Mechanistic View and Genetic Control of DNA Recombination during  
914 Meiosis." *Molecular Cell* 70 (1). Elsevier Inc.: 9–20. doi:10.1016/j.molcel.2018.02.032.
- 915 Marti, Thomas M., Christophe Kunz, and Oliver Fleck. 2002. "DNA Mismatch Repair and Mutation  
916 Avoidance Pathways." *Journal of Cellular Physiology* 191 (1): 28–41. doi:10.1002/jcp.10077.
- 917 Martini, Emmanuelle, Valérie Borde, Matthieu Legendre, Stéphane Audic, Béatrice Regnault,  
918 Guillaume Soubigou, Bernard Dujon, and Bertrand Llorente. 2011. "Genome-Wide Analysis of  
919 Heteroduplex DNA in Mismatch Repair-Deficient Yeast Cells Reveals Novel Properties of  
920 Meiotic Recombination Pathways." *PLoS Genetics* 7 (9): e1002305.  
921 doi:10.1371/journal.pgen.1002305.
- 922 Martini, Emmanuelle, Robert L Diaz, Neil Hunter, and Scott Keeney. 2006. "Crossover  
923 Homeostasis in Yeast Meiosis." *Cell* 126 (2): 285–95. doi:10.1016/j.cell.2006.05.044.
- 924 Miyoshi, Tomoichiro, Masaru Ito, and Kunihiro Ohta. 2013. "Spatiotemporal Regulation of Meiotic  
925 Recombination by Liaisonin." *Bioarchitecture* 3 (1): 20–24. doi:10.4161/bioa.23966.
- 926 Modliszewski, Jennifer L, Hongkuan Wang, Ashley R Albright, Scott M Lewis, Alexander R  
927 Bennett, Jiyue Huang, Hong Ma, Yingxiang Wang, and Gregory P. Copenhaver. 2018.  
928 "Elevated Temperature Increases Meiotic Crossover Frequency via the Interfering (Type I)



- 929 Pathway in *Arabidopsis Thaliana*." Edited by Gregory S. Barsh. *PLOS Genetics* 14 (5):  
930 e1007384. doi:10.1371/journal.pgen.1007384.
- 931 Muyt, Arnaud De, Lea Jessop, Elizabeth Kolar, Anuradha Sourirajan, Jianhong Chen, Yaron  
932 Dayani, and Michael Lichten. 2012. "BLM Helicase Ortholog Sgs1 Is a Central Regulator of  
933 Meiotic Recombination Intermediate Metabolism." *Molecular Cell* 46 (1). Elsevier Inc.: 43–53.  
934 doi:10.1016/j.molcel.2012.02.020.
- 935 Osman, Fekret, Jong Sook Ahn, Alexander Lorenz, and Matthew C. Whitby. 2016. "The RecQ  
936 DNA Helicase Rqh1 Constrains Exonuclease 1-Dependent Recombination at Stalled  
937 Replication Forks." *Scientific Reports* 6 (February): 22837. doi:10.1038/srep22837.
- 938 Osman, Fekret, Julie Dixon, Claudette L Doe, and Matthew C Whitby. 2003. "Generating  
939 Crossovers by Resolution of Nicked Holliday Junctions: A Role for Mus81-Eme1 in Meiosis."  
940 *Molecular Cell* 12 (3): 761–74. doi:10.1016/S1097-2765(03)00343-5.
- 941 Park, Jung-Min, Robert V Intine, and Richard J Maraia. 2007. "Mouse and Human La Proteins  
942 Differ in Kinase Substrate Activity and Activation Mechanism for TRNA Processing." *Gene  
943 Expression* 14 (2): 71–81. <http://www.ncbi.nlm.nih.gov/pubmed/18257391>.
- 944 Parker, A E, R K Clyne, A M Carr, and T J Kelly. 1997. "The *Schizosaccharomyces Pombe*  
945 *Rad11+* Gene Encodes the Large Subunit of Replication Protein A." *Molecular and Cellular  
946 Biology* 17 (5): 2381–90. <http://www.ncbi.nlm.nih.gov/pubmed/9111307>.
- 947 Piazza, Aurèle, William Douglass Wright, and Wolf Dietrich Heyer. 2017. "Multi-Invasions Are  
948 Recombination Byproducts That Induce Chromosomal Rearrangements." *Cell* 170 (4): 760–  
949 73. doi:10.1016/j.cell.2017.06.052.
- 950 Plough, H. H. 1917. "The Effect of Temperature on Linkage in the Second Chromosome of  
951 *Drosophila*." *Proceedings of the National Academy of Sciences of the United States of  
952 America* 3 (9): 553–55. doi:10.1073/pnas.3.9.553.
- 953 Pryce, David W, Alexander Lorenz, Julia B Smirnova, Josef Loidl, and Ramsay J McFarlane. 2005.  
954 "Differential Activation of M26-Containing Meiotic Recombination Hot Spots in  
955 *Schizosaccharomyces Pombe*." *Genetics* 170 (1): 95–106. doi:10.1534/genetics.104.036301.
- 956 Rogacheva, Maria V., Carol M. Manhart, G. Chen, Alba Guarne, Jennifer Surtees, and Eric Alani.  
957 2014. "Mlh1-Mlh3, a Meiotic Crossover and DNA Mismatch Repair Factor, Is a Msh2-Msh3-  
958 Stimulated Endonuclease." *Journal of Biological Chemistry* 289 (9): 5664–73.  
959 doi:10.1074/jbc.M113.534644.
- 960 Rose, A M, and D L Baillie. 1979. "The Effect of Temperature and Parental Age on Recombination  
961 and Nondisjunction in *Caenorhabditis Elegans*." *Genetics* 92 (2): 409–18.
- 962 Sabatinos, Sarah A, and Susan L Forsburg. 2010. "Molecular Genetics of *Schizosaccharomyces  
963 Pombe*." *Methods in Enzymology* 470 (10). Elsevier Inc: 759–95. doi:10.1016/S0076-  
964 6879(10)70032-X.
- 965 Sambrook, J.F., and D.W. Russell. 2000. *Molecular Cloning: A Laboratory Manual*. 3rd ed. Cold  
966 Spring Harbor: Cold Spring Harbor Laboratory Press.
- 967 Sato, Masamitsu, Susheela Dhut, and Takashi Toda. 2005. "New Drug-Resistant Cassettes for  
968 Gene Disruption and Epitope Tagging in *Schizosaccharomyces Pombe*." *Yeast* 22 (7): 583–  
969 91. doi:10.1002/yea.1233.
- 970 Schär, Primo, and Jürg Kohli. 1993. "Marker Effects of G to C Transversions on Intragenic  
971 Recombination and Mismatch Repair in *Schizosaccharomyces Pombe*." *Genetics* 133 (4):  
972 825–35. <https://www.ncbi.nlm.nih.gov/pubmed/8462844>.
- 973 Schär, Primo, Peter Munz, and Jürg Kohli. 1993. "Meiotic Mismatch Repair Quantified on the Basis  
974 of Segregation Patterns in *Schizosaccharomyces Pombe*." *Genetics* 133 (4): 815–24.
- 975 Steiner, Walter W, and Gerald R Smith. 2005. "Optimizing the Nucleotide Sequence of a Meiotic  
976 Recombination Hotspot in *Schizosaccharomyces Pombe*." *Genetics* 169 (4): 1973–83.  
977 doi:10.1534/genetics.104.039230.
- 978 Steiner, Walter W, Estelle M Steiner, Angela R Girvin, and Lauren E Plewik. 2009. "Novel

- 979 Nucleotide Sequence Motifs That Produce Hotspots of Meiotic Recombination in  
980 *Schizosaccharomyces Pombe*.” *Genetics* 182 (2): 459–69. doi:10.1534/genetics.109.101253.
- 981 Surtees, J. A., J. L. Argueso, and E. Alani. 2004. “Mismatch Repair Proteins: Key Regulators of  
982 Genetic Recombination.” *Cytogenetic and Genome Research* 107 (3–4): 146–59.  
983 doi:10.1159/000080593.
- 984 Szankasi, Philippe, Wolf Dietrich Heyer, Peter Schuchert, and Jürg Kohli. 1988. “DNA Sequence  
985 Analysis of the *Ade6* Gene of *Schizosaccharomyces Pombe* - Wild-Type and Mutant Alleles  
986 Including the Recombination Hot Spot Allele *Ade6-M26*.” *Journal of Molecular Biology* 204  
987 (4): 917–25. doi:10.1016/0022-2836(88)90051-4.
- 988 Wahls, Wayne P., and Mari K. Davidson. 2012. “New Paradigms for Conserved, Multifactorial, Cis-  
989 Acting Regulation of Meiotic Recombination.” *Nucleic Acids Research* 40 (20): 9983–89.  
990 doi:10.1093/nar/gks761.
- 991 Yamada, Shintaro, Kunihiro Ohta, and Takatomi Yamada. 2013. “Acetylated Histone H3K9 Is  
992 Associated with Meiotic Recombination Hotspots, and Plays a Role in Recombination  
993 Redundantly with Other Factors Including the H3K4 Methylase Set1 in Fission Yeast.” *Nucleic  
994 Acids Research* 41 (6): 3504–17. doi:10.1093/nar/gkt049.
- 995 Yamada, Shintaro, Mika Okamura, Arisa Oda, Hiroshi Murakami, Kunihiro Ohta, and Takatomi  
996 Yamada. 2017. “Correlation of Meiotic DSB Formation and Transcription Initiation around  
997 Fission Yeast Recombination Hotspots.” *Genetics* 206 (2): 801–9.  
998 doi:10.1534/genetics.116.197954.
- 999 Zahn-Zabal, Monique, and Jürg Kohli. 1996. “The Distance-Dependence of the Fission Yeast  
1000 *Ade6-M26* Marker Effect in Two-Factor Crosses.” *Current Genetics* 29 (6): 530–36.  
1001 doi:10.1007/BF02426957.
- 1002 Zhang, Ke, Xue-Chang Wu, Dao-Qiong Zheng, and Thomas D Petes. 2017. “Effects of  
1003 Temperature on the Meiotic Recombination Landscape of the Yeast *Saccharomyces  
1004 Cerevisiae*.” *MBio* 8 (6): e02099-17. doi:10.1128/mBio.02099-17.
- 1005
